# Supplementary material
Source: publisher figshare collection journal article supplement (https://acs.figshare.com/ndownloader/files/3979330)
Supplement: Supplementary file 1 [file 3979330]

data_complex_1
 
_audit_creation_method            SHELXL-97
_chemical_name_systematic
;
 ?
;
_chemical_name_common             ?
_chemical_melting_point           ?
_chemical_formula_moiety          'C15 H31 Fe2 N5 O11 S'
_chemical_formula_sum             'C15 H31 Fe2 N5 O11 S'
_chemical_formula_weight          601.21
 
loop_
 _atom_type_symbol
 _atom_type_description
 _atom_type_scat_dispersion_real
 _atom_type_scat_dispersion_imag
 _atom_type_scat_source
 'C'  'C'   0.0033   0.0016
 'International Tables Vol C Tables 4.2.6.8 and 6.1.1.4'
 'H'  'H'   0.0000   0.0000
 'International Tables Vol C Tables 4.2.6.8 and 6.1.1.4'
 'N'  'N'   0.0061   0.0033
 'International Tables Vol C Tables 4.2.6.8 and 6.1.1.4'
 'O'  'O'   0.0106   0.0060
 'International Tables Vol C Tables 4.2.6.8 and 6.1.1.4'
 'S'  'S'   0.1246   0.1234
 'International Tables Vol C Tables 4.2.6.8 and 6.1.1.4'
 'Fe'  'Fe'   0.3463   0.8444
 'International Tables Vol C Tables 4.2.6.8 and 6.1.1.4'
 
_symmetry_cell_setting            monoclinic
_symmetry_space_group_name_H-M    'P 21/c'
 
loop_
 _symmetry_equiv_pos_as_xyz
 'x, y, z'
 '-x, y+1/2, -z+1/2'
 '-x, -y, -z'
 'x, -y-1/2, z-1/2'
 
_cell_length_a                    10.8834(6)
_cell_length_b                    10.7139(6)
_cell_length_c                    22.0706(11)
_cell_angle_alpha                 90.00
_cell_angle_beta                  98.478(2)
_cell_angle_gamma                 90.00
_cell_volume                      2545.4(2)
_cell_formula_units_Z             4
_cell_measurement_temperature     200(2)
_cell_measurement_reflns_used     0
_cell_measurement_theta_min       0
_cell_measurement_theta_max       0
 
_exptl_crystal_description        prism
_exptl_crystal_colour             green(dark)
_exptl_crystal_size_max           0.30
_exptl_crystal_size_mid           0.19
_exptl_crystal_size_min           0.04
_exptl_crystal_density_meas       ?
_exptl_crystal_density_diffrn     1.569
_exptl_crystal_density_method     'not measured'
_exptl_crystal_F_000              1248
_exptl_absorpt_coefficient_mu     1.282
_exptl_absorpt_correction_type    multi-scan
_exptl_absorpt_correction_T_min   0.6996
_exptl_absorpt_correction_T_max   0.9505
_exptl_absorpt_process_details    ?
 
_exptl_special_details
;
 ?
;
 
_diffrn_ambient_temperature       200(2)
_diffrn_radiation_wavelength      0.71073
_diffrn_radiation_type            MoK\a
_diffrn_radiation_source          'fine-focus sealed tube'
_diffrn_radiation_monochromator   graphite
_diffrn_measurement_device_type   ?
_diffrn_measurement_method        ?
_diffrn_detector_area_resol_mean  ?
_diffrn_standards_number          ?
_diffrn_standards_interval_count  ?
_diffrn_standards_interval_time   ?
_diffrn_standards_decay_%         ?
_diffrn_reflns_number             17967
_diffrn_reflns_av_R_equivalents   0.0432
_diffrn_reflns_av_sigmaI/netI     0.0428
_diffrn_reflns_limit_h_min        -12
_diffrn_reflns_limit_h_max        9
_diffrn_reflns_limit_k_min        -12
_diffrn_reflns_limit_k_max        12
_diffrn_reflns_limit_l_min        -17
_diffrn_reflns_limit_l_max        26
_diffrn_reflns_theta_min          1.89
_diffrn_reflns_theta_max          25.07
_reflns_number_total              4519
_reflns_number_gt                 3474
_reflns_threshold_expression      >2sigma(I)
 
_computing_data_collection        ?
_computing_cell_refinement        ?
_computing_data_reduction         ?
_computing_structure_solution     'SHELXS-86 (Sheldrick, 1986)'
_computing_structure_refinement   'SHELXL-97 (Sheldrick, 1997)'
_computing_molecular_graphics     'Ortep-3 for Windows (Farrugia, 1997)'
_computing_publication_material   'WinGX publication routines (Farrugia, 1999)'
 
_refine_special_details
;
 Refinement of F^2^ against ALL reflections.  The weighted R-factor wR and
 goodness of fit S are based on F^2^, conventional R-factors R are based
 on F, with F set to zero for negative F^2^. The threshold expression of
 F^2^ > 2sigma(F^2^) is used only for calculating R-factors(gt) etc. and is
 not relevant to the choice of reflections for refinement.  R-factors based
 on F^2^ are statistically about twice as large as those based on F, and R-
 factors based on ALL data will be even larger.
;
 
_refine_ls_structure_factor_coef  Fsqd
_refine_ls_matrix_type            full
_refine_ls_weighting_scheme       calc
_refine_ls_weighting_details
 'calc w=1/[\s^2^(Fo^2^)+(0.0564P)^2^+0.0000P] where P=(Fo^2^+2Fc^2^)/3'
_atom_sites_solution_primary      direct
_atom_sites_solution_secondary    difmap
_atom_sites_solution_hydrogens    geom
_refine_ls_hydrogen_treatment     constr
_refine_ls_extinction_method      none
_refine_ls_extinction_coef        ?
_refine_ls_number_reflns          4519
_refine_ls_number_parameters      314
_refine_ls_number_restraints      0
_refine_ls_R_factor_all           0.0570
_refine_ls_R_factor_gt            0.0362
_refine_ls_wR_factor_ref          0.1031
_refine_ls_wR_factor_gt           0.0859
_refine_ls_goodness_of_fit_ref    1.065
_refine_ls_restrained_S_all       1.065
_refine_ls_shift/su_max           0.001
_refine_ls_shift/su_mean          0.000
 
loop_
 _atom_site_label
 _atom_site_type_symbol
 _atom_site_fract_x
 _atom_site_fract_y
 _atom_site_fract_z
 _atom_site_U_iso_or_equiv
 _atom_site_adp_type
 _atom_site_occupancy
 _atom_site_symmetry_multiplicity
 _atom_site_calc_flag
 _atom_site_refinement_flags
 _atom_site_disorder_assembly
 _atom_site_disorder_group
C1 C 0.0239(3) 0.5938(3) 0.08833(15) 0.0319(7) Uani 1 1 d . . .
C2 C 0.1895(3) 0.4403(3) 0.26361(14) 0.0338(8) Uani 1 1 d . . .
H2A H 0.1070 0.4080 0.2456 0.041 Uiso 1 1 calc R . .
H2B H 0.2492 0.3701 0.2663 0.041 Uiso 1 1 calc R . .
C3 C 0.1826(2) 0.4884(3) 0.32699(14) 0.0318(7) Uani 1 1 d . . .
H3A H 0.1210 0.5569 0.3245 0.038 Uiso 1 1 calc R . .
H3B H 0.1538 0.4206 0.3520 0.038 Uiso 1 1 calc R . .
C4 C 0.1798(3) 0.7613(4) 0.46106(18) 0.0544(10) Uani 1 1 d . A .
H4A H 0.1154 0.8239 0.4665 0.065 Uiso 1 1 calc R . .
H4B H 0.2594 0.7882 0.4852 0.065 Uiso 1 1 calc R . .
C5 C 0.1436(3) 0.6371(4) 0.48217(17) 0.0516(11) Uani 1 1 d . . .
H5A H 0.1217 0.6441 0.5240 0.062 Uiso 1 1 calc R . .
H5B H 0.0698 0.6062 0.4547 0.062 Uiso 1 1 calc R . .
C6 C 0.2142(3) 0.4316(4) 0.50356(17) 0.0542(11) Uani 1 1 d . . .
H6A H 0.1410 0.3975 0.4767 0.065 Uiso 1 1 calc R . .
H6B H 0.1932 0.4385 0.5456 0.065 Uiso 1 1 calc R . .
C7 C 0.3225(4) 0.3453(4) 0.50360(17) 0.0574(11) Uani 1 1 d . . .
H7A H 0.3975 0.3821 0.5278 0.069 Uiso 1 1 calc R . .
H7B H 0.3051 0.2646 0.5225 0.069 Uiso 1 1 calc R . .
C8 C 0.4448(3) 0.2456(4) 0.43789(18) 0.0558(11) Uani 1 1 d . . .
H8A H 0.4328 0.1650 0.4581 0.067 Uiso 1 1 calc R . .
H8B H 0.5227 0.2839 0.4584 0.067 Uiso 1 1 calc R . .
C9 C 0.4523(3) 0.2251(4) 0.37188(18) 0.0509(10) Uani 1 1 d . . .
H9A H 0.5194 0.1645 0.3681 0.061 Uiso 1 1 calc R . .
H9B H 0.3731 0.1885 0.3518 0.061 Uiso 1 1 calc R . .
C10 C 0.6048(3) 0.3687(4) 0.34572(19) 0.0526(11) Uani 1 1 d . . .
H10A H 0.6505 0.3000 0.3289 0.063 Uiso 1 1 calc R . .
H10B H 0.6405 0.3812 0.3892 0.063 Uiso 1 1 calc R . .
C11 C 0.6159(3) 0.4859(4) 0.31022(18) 0.0519(11) Uani 1 1 d . . .
H11A H 0.7043 0.5028 0.3075 0.062 Uiso 1 1 calc R . .
H11B H 0.5708 0.4766 0.2681 0.062 Uiso 1 1 calc R . .
C12 C 0.5771(3) 0.7007(4) 0.30922(18) 0.0494(10) Uani 1 1 d . . .
H12A H 0.5371 0.6934 0.2661 0.059 Uiso 1 1 calc R . .
H12B H 0.6662 0.7197 0.3094 0.059 Uiso 1 1 calc R . .
C13 C 0.5181(4) 0.8023(4) 0.33971(19) 0.0550(11) Uani 1 1 d . A .
H13A H 0.5486 0.8016 0.3842 0.066 Uiso 1 1 calc R . .
H13B H 0.5390 0.8840 0.3229 0.066 Uiso 1 1 calc R . .
C14 C 0.3419(8) 0.8825(7) 0.3655(4) 0.055(2) Uani 0.619(6) 1 d P A 1
H14A H 0.3576 0.9657 0.3487 0.067 Uiso 0.619(6) 1 calc PR A 1
H14B H 0.3821 0.8784 0.4087 0.067 Uiso 0.619(6) 1 calc PR A 1
C15 C 0.2040(7) 0.8578(6) 0.3606(4) 0.0530(17) Uani 0.619(6) 1 d P A 1
H15A H 0.1609 0.9307 0.3752 0.064 Uiso 0.619(6) 1 calc PR A 1
H15B H 0.1678 0.8403 0.3176 0.064 Uiso 0.619(6) 1 calc PR A 1
C14' C 0.2903(13) 0.8773(13) 0.3324(7) 0.055(2) Uani 0.381(6) 1 d P A 2
H14C H 0.3177 0.9606 0.3203 0.067 Uiso 0.381(6) 1 calc PR A 2
H14D H 0.2139 0.8539 0.3046 0.067 Uiso 0.381(6) 1 calc PR A 2
C15' C 0.2674(12) 0.8788(11) 0.3954(6) 0.0530(17) Uani 0.381(6) 1 d P A 2
H15C H 0.2168 0.9518 0.4038 0.064 Uiso 0.381(6) 1 calc PR A 2
H15D H 0.3460 0.8786 0.4244 0.064 Uiso 0.381(6) 1 calc PR A 2
Fe1 Fe 0.06308(4) 0.66632(4) 0.17195(2) 0.03015(15) Uani 1 1 d . . .
Fe2 Fe 0.17160(4) 0.48829(5) 0.11720(2) 0.03207(15) Uani 1 1 d . . .
N1 N 0.0883(2) 0.8137(3) 0.15443(13) 0.0375(7) Uani 1 1 d . . .
N2 N -0.0596(2) 0.6313(3) 0.20415(12) 0.0390(7) Uani 1 1 d . . .
N3 N 0.1216(3) 0.3434(3) 0.12072(13) 0.0440(7) Uani 1 1 d . . .
N4 N 0.2759(2) 0.5127(3) 0.07086(12) 0.0388(7) Uani 1 1 d . . .
N5 N 0.30444(19) 0.5348(2) 0.35737(11) 0.0248(6) Uani 1 1 d . . .
H5C H 0.3617 0.4701 0.3574 0.030 Uiso 1 1 d R . .
H5D H 0.3187 0.6105 0.3433 0.030 Uiso 1 1 d R . .
H5E H 0.3092 0.5549 0.3966 0.030 Uiso 1 1 d R . .
O1 O -0.0484(2) 0.6083(3) 0.04626(11) 0.0550(7) Uani 1 1 d . . .
O2 O 0.0871(2) 0.9207(3) 0.14095(13) 0.0574(7) Uani 1 1 d . . .
O3 O -0.1535(2) 0.6210(3) 0.22533(13) 0.0634(8) Uani 1 1 d . . .
O4 O 0.1007(3) 0.2356(3) 0.12060(15) 0.0737(9) Uani 1 1 d . . .
O5 O 0.3515(2) 0.5080(3) 0.03715(12) 0.0568(7) Uani 1 1 d . . .
O6 O 0.1926(3) 0.7510(3) 0.39848(14) 0.0745(9) Uani 1 1 d . . .
O7 O 0.2437(2) 0.5515(2) 0.48224(10) 0.0429(6) Uani 1 1 d . . .
O8 O 0.3429(2) 0.3260(2) 0.44231(10) 0.0466(6) Uani 1 1 d . . .
O9 O 0.47599(18) 0.3380(2) 0.34095(10) 0.0393(6) Uani 1 1 d . . .
O10 O 0.56473(18) 0.5868(2) 0.34028(10) 0.0390(6) Uani 1 1 d . . .
O11 O 0.3888(2) 0.7839(2) 0.32936(12) 0.0538(7) Uani 1 1 d . . .
S1 S 0.23788(6) 0.56048(8) 0.21306(3) 0.0301(2) Uani 1 1 d . . .
 
loop_
 _atom_site_aniso_label
 _atom_site_aniso_U_11
 _atom_site_aniso_U_22
 _atom_site_aniso_U_33
 _atom_site_aniso_U_23
 _atom_site_aniso_U_13
 _atom_site_aniso_U_12
C1 0.0322(16) 0.034(2) 0.0293(18) 0.0010(15) 0.0033(14) -0.0006(14)
C2 0.0387(17) 0.028(2) 0.0320(18) 0.0017(15) -0.0023(14) -0.0065(14)
C3 0.0254(14) 0.036(2) 0.0339(18) 0.0047(16) 0.0037(13) -0.0055(14)
C4 0.047(2) 0.050(3) 0.067(3) -0.015(2) 0.0122(19) 0.0111(18)
C5 0.049(2) 0.070(3) 0.041(2) 0.007(2) 0.0228(17) 0.0195(19)
C6 0.056(2) 0.065(3) 0.046(2) 0.018(2) 0.0229(18) 0.003(2)
C7 0.080(3) 0.057(3) 0.038(2) 0.019(2) 0.015(2) 0.013(2)
C8 0.059(2) 0.042(3) 0.067(3) 0.012(2) 0.008(2) 0.0104(19)
C9 0.056(2) 0.035(2) 0.062(3) 0.001(2) 0.0100(19) 0.0082(18)
C10 0.0315(17) 0.056(3) 0.073(3) -0.007(2) 0.0138(18) 0.0131(17)
C11 0.0335(17) 0.066(3) 0.061(3) 0.003(2) 0.0222(17) 0.0089(18)
C12 0.0325(17) 0.055(3) 0.062(2) 0.023(2) 0.0104(17) -0.0063(17)
C13 0.068(2) 0.039(3) 0.054(2) 0.010(2) -0.005(2) -0.021(2)
C14 0.069(6) 0.029(3) 0.073(6) 0.000(5) 0.025(4) -0.001(4)
C15 0.066(5) 0.034(3) 0.063(5) 0.004(4) 0.024(3) 0.013(3)
C14' 0.069(6) 0.029(3) 0.073(6) 0.000(5) 0.025(4) -0.001(4)
C15' 0.066(5) 0.034(3) 0.063(5) 0.004(4) 0.024(3) 0.013(3)
Fe1 0.0288(2) 0.0295(3) 0.0335(3) -0.0023(2) 0.00862(19) -0.00056(19)
Fe2 0.0338(2) 0.0346(3) 0.0274(3) -0.0045(2) 0.00328(19) 0.0030(2)
N1 0.0300(13) 0.037(2) 0.0471(17) 0.0007(15) 0.0110(12) 0.0028(12)
N2 0.0407(15) 0.0338(18) 0.0447(17) -0.0057(14) 0.0136(13) 0.0000(13)
N3 0.0446(16) 0.040(2) 0.0447(18) -0.0073(15) -0.0040(13) 0.0014(15)
N4 0.0448(15) 0.0394(19) 0.0329(16) -0.0048(14) 0.0076(13) 0.0077(13)
N5 0.0257(12) 0.0227(15) 0.0262(13) 0.0005(11) 0.0048(10) -0.0012(10)
O1 0.0493(14) 0.071(2) 0.0411(15) -0.0002(14) -0.0033(12) 0.0072(14)
O2 0.0484(14) 0.0341(17) 0.093(2) 0.0111(15) 0.0222(14) 0.0038(12)
O3 0.0490(14) 0.064(2) 0.087(2) -0.0102(16) 0.0422(15) -0.0109(14)
O4 0.0735(19) 0.0369(19) 0.103(3) -0.0111(17) -0.0136(16) -0.0065(15)
O5 0.0619(15) 0.060(2) 0.0562(17) -0.0005(14) 0.0322(14) 0.0079(13)
O6 0.106(2) 0.0444(19) 0.090(2) 0.0173(16) 0.0705(18) 0.0270(16)
O7 0.0447(12) 0.0484(17) 0.0383(13) 0.0055(12) 0.0147(11) 0.0066(11)
O8 0.0560(14) 0.0450(16) 0.0401(14) 0.0112(12) 0.0111(11) 0.0135(12)
O9 0.0332(11) 0.0361(15) 0.0486(14) -0.0031(12) 0.0059(10) 0.0071(10)
O10 0.0344(11) 0.0440(16) 0.0398(13) 0.0064(12) 0.0099(10) -0.0038(10)
O11 0.0513(14) 0.0301(15) 0.087(2) 0.0042(14) 0.0343(14) 0.0004(12)
S1 0.0299(4) 0.0328(5) 0.0272(4) -0.0008(4) 0.0030(3) -0.0037(3)
 
_geom_special_details
;
 All esds (except the esd in the dihedral angle between two l.s. planes)
 are estimated using the full covariance matrix.  The cell esds are taken
 into account individually in the estimation of esds in distances, angles
 and torsion angles; correlations between esds in cell parameters are only
 used when they are defined by crystal symmetry.  An approximate (isotropic)
 treatment of cell esds is used for estimating esds involving l.s. planes.
;
 
loop_
 _geom_bond_atom_site_label_1
 _geom_bond_atom_site_label_2
 _geom_bond_distance
 _geom_bond_site_symmetry_2
 _geom_bond_publ_flag
C1 O1 1.136(4) . ?
C1 Fe1 1.990(3) . ?
C1 Fe2 1.992(3) . ?
C2 C3 1.503(4) . ?
C2 S1 1.831(3) . ?
C2 H2A 0.9900 . ?
C2 H2B 0.9900 . ?
C3 N5 1.481(4) . ?
C3 H3A 0.9900 . ?
C3 H3B 0.9900 . ?
C4 O6 1.413(4) . ?
C4 C5 1.482(5) . ?
C4 H4A 0.9900 . ?
C4 H4B 0.9900 . ?
C5 O7 1.423(4) . ?
C5 H5A 0.9900 . ?
C5 H5B 0.9900 . ?
C6 O7 1.421(4) . ?
C6 C7 1.497(5) . ?
C6 H6A 0.9900 . ?
C6 H6B 0.9900 . ?
C7 O8 1.418(4) . ?
C7 H7A 0.9900 . ?
C7 H7B 0.9900 . ?
C8 O8 1.419(4) . ?
C8 C9 1.488(5) . ?
C8 H8A 0.9900 . ?
C8 H8B 0.9900 . ?
C9 O9 1.431(4) . ?
C9 H9A 0.9900 . ?
C9 H9B 0.9900 . ?
C10 O9 1.429(4) . ?
C10 C11 1.495(5) . ?
C10 H10A 0.9900 . ?
C10 H10B 0.9900 . ?
C11 O10 1.424(4) . ?
C11 H11A 0.9900 . ?
C11 H11B 0.9900 . ?
C12 O10 1.416(4) . ?
C12 C13 1.476(5) . ?
C12 H12A 0.9900 . ?
C12 H12B 0.9900 . ?
C13 O11 1.405(4) . ?
C13 H13A 0.9900 . ?
C13 H13B 0.9900 . ?
C14 O11 1.459(8) . ?
C14 C15 1.512(12) . ?
C14 H14A 0.9900 . ?
C14 H14B 0.9900 . ?
C15 O6 1.434(7) . ?
C15 H15A 0.9900 . ?
C15 H15B 0.9900 . ?
C14' C15' 1.449(19) . ?
C14' O11 1.475(14) . ?
C14' H14C 0.9900 . ?
C14' H14D 0.9900 . ?
C15' O6 1.600(12) . ?
C15' H15C 0.9900 . ?
C15' H15D 0.9900 . ?
Fe1 N2 1.646(2) . ?
Fe1 N1 1.658(3) . ?
Fe1 S1 2.2846(9) . ?
Fe1 Fe2 2.6295(6) . ?
Fe2 N3 1.651(3) . ?
Fe2 N4 1.657(3) . ?
Fe2 S1 2.2682(9) . ?
N1 O2 1.184(3) . ?
N2 O3 1.190(3) . ?
N3 O4 1.177(4) . ?
N4 O5 1.189(3) . ?
N5 H5C 0.9321 . ?
N5 H5D 0.8907 . ?
N5 H5E 0.8864 . ?
 
loop_
 _geom_angle_atom_site_label_1
 _geom_angle_atom_site_label_2
 _geom_angle_atom_site_label_3
 _geom_angle
 _geom_angle_site_symmetry_1
 _geom_angle_site_symmetry_3
 _geom_angle_publ_flag
O1 C1 Fe1 137.1(3) . . ?
O1 C1 Fe2 140.2(3) . . ?
Fe1 C1 Fe2 82.66(13) . . ?
C3 C2 S1 112.6(2) . . ?
C3 C2 H2A 109.1 . . ?
S1 C2 H2A 109.1 . . ?
C3 C2 H2B 109.1 . . ?
S1 C2 H2B 109.1 . . ?
H2A C2 H2B 107.8 . . ?
N5 C3 C2 111.8(2) . . ?
N5 C3 H3A 109.2 . . ?
C2 C3 H3A 109.2 . . ?
N5 C3 H3B 109.2 . . ?
C2 C3 H3B 109.2 . . ?
H3A C3 H3B 107.9 . . ?
O6 C4 C5 107.8(3) . . ?
O6 C4 H4A 110.1 . . ?
C5 C4 H4A 110.1 . . ?
O6 C4 H4B 110.1 . . ?
C5 C4 H4B 110.1 . . ?
H4A C4 H4B 108.5 . . ?
O7 C5 C4 109.9(3) . . ?
O7 C5 H5A 109.7 . . ?
C4 C5 H5A 109.7 . . ?
O7 C5 H5B 109.7 . . ?
C4 C5 H5B 109.7 . . ?
H5A C5 H5B 108.2 . . ?
O7 C6 C7 110.0(3) . . ?
O7 C6 H6A 109.7 . . ?
C7 C6 H6A 109.7 . . ?
O7 C6 H6B 109.7 . . ?
C7 C6 H6B 109.7 . . ?
H6A C6 H6B 108.2 . . ?
O8 C7 C6 108.8(3) . . ?
O8 C7 H7A 109.9 . . ?
C6 C7 H7A 109.9 . . ?
O8 C7 H7B 109.9 . . ?
C6 C7 H7B 109.9 . . ?
H7A C7 H7B 108.3 . . ?
O8 C8 C9 108.3(3) . . ?
O8 C8 H8A 110.0 . . ?
C9 C8 H8A 110.0 . . ?
O8 C8 H8B 110.0 . . ?
C9 C8 H8B 110.0 . . ?
H8A C8 H8B 108.4 . . ?
O9 C9 C8 112.4(3) . . ?
O9 C9 H9A 109.1 . . ?
C8 C9 H9A 109.1 . . ?
O9 C9 H9B 109.1 . . ?
C8 C9 H9B 109.1 . . ?
H9A C9 H9B 107.8 . . ?
O9 C10 C11 108.0(3) . . ?
O9 C10 H10A 110.1 . . ?
C11 C10 H10A 110.1 . . ?
O9 C10 H10B 110.1 . . ?
C11 C10 H10B 110.1 . . ?
H10A C10 H10B 108.4 . . ?
O10 C11 C10 109.0(3) . . ?
O10 C11 H11A 109.9 . . ?
C10 C11 H11A 109.9 . . ?
O10 C11 H11B 109.9 . . ?
C10 C11 H11B 109.9 . . ?
H11A C11 H11B 108.3 . . ?
O10 C12 C13 109.6(3) . . ?
O10 C12 H12A 109.7 . . ?
C13 C12 H12A 109.7 . . ?
O10 C12 H12B 109.7 . . ?
C13 C12 H12B 109.7 . . ?
H12A C12 H12B 108.2 . . ?
O11 C13 C12 108.4(3) . . ?
O11 C13 H13A 110.0 . . ?
C12 C13 H13A 110.0 . . ?
O11 C13 H13B 110.0 . . ?
C12 C13 H13B 110.0 . . ?
H13A C13 H13B 108.4 . . ?
O11 C14 C15 104.9(6) . . ?
O11 C14 H14A 110.8 . . ?
C15 C14 H14A 110.8 . . ?
O11 C14 H14B 110.8 . . ?
C15 C14 H14B 110.8 . . ?
H14A C14 H14B 108.8 . . ?
O6 C15 C14 105.6(6) . . ?
O6 C15 H15A 110.6 . . ?
C14 C15 H15A 110.6 . . ?
O6 C15 H15B 110.6 . . ?
C14 C15 H15B 110.6 . . ?
H15A C15 H15B 108.8 . . ?
C15' C14' O11 106.2(11) . . ?
C15' C14' H14C 110.5 . . ?
O11 C14' H14C 110.5 . . ?
C15' C14' H14D 110.5 . . ?
O11 C14' H14D 110.5 . . ?
H14C C14' H14D 108.7 . . ?
C14' C15' O6 101.1(10) . . ?
C14' C15' H15C 111.6 . . ?
O6 C15' H15C 111.6 . . ?
C14' C15' H15D 111.6 . . ?
O6 C15' H15D 111.6 . . ?
H15C C15' H15D 109.4 . . ?
N2 Fe1 N1 119.38(13) . . ?
N2 Fe1 C1 103.58(13) . . ?
N1 Fe1 C1 100.13(14) . . ?
N2 Fe1 S1 113.35(10) . . ?
N1 Fe1 S1 114.12(9) . . ?
C1 Fe1 S1 103.10(9) . . ?
N2 Fe1 Fe2 118.75(10) . . ?
N1 Fe1 Fe2 118.86(9) . . ?
C1 Fe1 Fe2 48.69(9) . . ?
S1 Fe1 Fe2 54.43(2) . . ?
N3 Fe2 N4 115.99(14) . . ?
N3 Fe2 C1 107.00(13) . . ?
N4 Fe2 C1 107.89(13) . . ?
N3 Fe2 S1 109.79(10) . . ?
N4 Fe2 S1 111.68(10) . . ?
C1 Fe2 S1 103.63(10) . . ?
N3 Fe2 Fe1 119.14(10) . . ?
N4 Fe2 Fe1 124.35(10) . . ?
C1 Fe2 Fe1 48.64(9) . . ?
S1 Fe2 Fe1 55.01(2) . . ?
O2 N1 Fe1 169.9(2) . . ?
O3 N2 Fe1 171.6(3) . . ?
O4 N3 Fe2 170.9(3) . . ?
O5 N4 Fe2 168.5(3) . . ?
C3 N5 H5C 107.8 . . ?
C3 N5 H5D 109.8 . . ?
H5C N5 H5D 121.7 . . ?
C3 N5 H5E 116.4 . . ?
H5C N5 H5E 103.7 . . ?
H5D N5 H5E 97.5 . . ?
C4 O6 C15 122.5(4) . . ?
C4 O6 C15' 95.7(5) . . ?
C15 O6 C15' 37.2(4) . . ?
C6 O7 C5 111.9(3) . . ?
C7 O8 C8 112.8(3) . . ?
C10 O9 C9 113.8(3) . . ?
C12 O10 C11 110.9(3) . . ?
C13 O11 C14 103.4(4) . . ?
C13 O11 C14' 127.9(6) . . ?
C14 O11 C14' 33.9(5) . . ?
C2 S1 Fe2 104.37(11) . . ?
C2 S1 Fe1 107.08(11) . . ?
Fe2 S1 Fe1 70.56(3) . . ?
 
_diffrn_measured_fraction_theta_max    0.999
_diffrn_reflns_theta_full              25.07
_diffrn_measured_fraction_theta_full   0.999
_refine_diff_density_max    0.347
_refine_diff_density_min   -0.474
_refine_diff_density_rms    0.127

****************************************************
data_complex_2
 
_audit_creation_method            SHELXL-97
_chemical_name_systematic
;
 ?
;
_chemical_name_common             ?
_chemical_melting_point           ?
_chemical_formula_moiety          'C16 H36 Fe2 N6 O10 S2'
_chemical_formula_sum             'C16 H36 Fe2 N6 O10 S2'
_chemical_formula_weight          648.33
 
loop_
 _atom_type_symbol
 _atom_type_description
 _atom_type_scat_dispersion_real
 _atom_type_scat_dispersion_imag
 _atom_type_scat_source
 'C'  'C'   0.0033   0.0016
 'International Tables Vol C Tables 4.2.6.8 and 6.1.1.4'
 'H'  'H'   0.0000   0.0000
 'International Tables Vol C Tables 4.2.6.8 and 6.1.1.4'
 'N'  'N'   0.0061   0.0033
 'International Tables Vol C Tables 4.2.6.8 and 6.1.1.4'
 'O'  'O'   0.0106   0.0060
 'International Tables Vol C Tables 4.2.6.8 and 6.1.1.4'
 'S'  'S'   0.1246   0.1234
 'International Tables Vol C Tables 4.2.6.8 and 6.1.1.4'
 'Fe'  'Fe'   0.3463   0.8444
 'International Tables Vol C Tables 4.2.6.8 and 6.1.1.4'
 
_symmetry_cell_setting            triclinic
_symmetry_space_group_name_H-M    'P -1'
 
loop_
 _symmetry_equiv_pos_as_xyz
 'x, y, z'
 '-x, -y, -z'
 
_cell_length_a                    9.002(2)
_cell_length_b                    11.907(3)
_cell_length_c                    15.175(4)
_cell_angle_alpha                 69.492(4)
_cell_angle_beta                  73.004(4)
_cell_angle_gamma                 69.942(4)
_cell_volume                      1403.5(6)
_cell_formula_units_Z             2
_cell_measurement_temperature     200(2)
_cell_measurement_reflns_used     0
_cell_measurement_theta_min       0
_cell_measurement_theta_max       0
 
_exptl_crystal_description        prism
_exptl_crystal_colour             green(dark)
_exptl_crystal_size_max           0.34
_exptl_crystal_size_mid           0.26
_exptl_crystal_size_min           0.13
_exptl_crystal_density_meas       ?
_exptl_crystal_density_diffrn     1.534
_exptl_crystal_density_method     'not measured'
_exptl_crystal_F_000              676
_exptl_absorpt_coefficient_mu     1.239
_exptl_absorpt_correction_type    multi-scan
_exptl_absorpt_correction_T_min   0.6781
_exptl_absorpt_correction_T_max   0.8555
_exptl_absorpt_process_details    ?
 
_exptl_special_details
;
 ?
;
 
_diffrn_ambient_temperature       200(2)
_diffrn_radiation_wavelength      0.71073
_diffrn_radiation_type            MoK\a
_diffrn_radiation_source          'fine-focus sealed tube'
_diffrn_radiation_monochromator   graphite
_diffrn_measurement_device_type   ?
_diffrn_measurement_method        ?
_diffrn_detector_area_resol_mean  ?
_diffrn_standards_number          ?
_diffrn_standards_interval_count  ?
_diffrn_standards_interval_time   ?
_diffrn_standards_decay_%         ?
_diffrn_reflns_number             11294
_diffrn_reflns_av_R_equivalents   0.0296
_diffrn_reflns_av_sigmaI/netI     0.0412
_diffrn_reflns_limit_h_min        -10
_diffrn_reflns_limit_h_max        7
_diffrn_reflns_limit_k_min        -13
_diffrn_reflns_limit_k_max        14
_diffrn_reflns_limit_l_min        -18
_diffrn_reflns_limit_l_max        16
_diffrn_reflns_theta_min          1.46
_diffrn_reflns_theta_max          25.00
_reflns_number_total              4836
_reflns_number_gt                 3794
_reflns_threshold_expression      >2sigma(I)
 
_computing_data_collection        ?
_computing_cell_refinement        ?
_computing_data_reduction         ?
_computing_structure_solution     'SHELXS-86 (Sheldrick, 1986)'
_computing_structure_refinement   'SHELXL-97 (Sheldrick, 1997)'
_computing_molecular_graphics     'Ortep-3 for Windows (Farrugia, 1997)'
_computing_publication_material   'WinGX publication routines (Farrugia, 1999)'
 
_refine_special_details
;
 Refinement of F^2^ against ALL reflections.  The weighted R-factor wR and
 goodness of fit S are based on F^2^, conventional R-factors R are based
 on F, with F set to zero for negative F^2^. The threshold expression of
 F^2^ > 2sigma(F^2^) is used only for calculating R-factors(gt) etc. and is
 not relevant to the choice of reflections for refinement.  R-factors based
 on F^2^ are statistically about twice as large as those based on F, and R-
 factors based on ALL data will be even larger.
;
 
_refine_ls_structure_factor_coef  Fsqd
_refine_ls_matrix_type            full
_refine_ls_weighting_scheme       calc
_refine_ls_weighting_details
 'calc w=1/[\s^2^(Fo^2^)+(0.1518P)^2^+6.4578P] where P=(Fo^2^+2Fc^2^)/3'
_atom_sites_solution_primary      direct
_atom_sites_solution_secondary    difmap
_atom_sites_solution_hydrogens    geom
_refine_ls_hydrogen_treatment     constr
_refine_ls_extinction_method      none
_refine_ls_extinction_coef        ?
_refine_ls_number_reflns          4836
_refine_ls_number_parameters      325
_refine_ls_number_restraints      0
_refine_ls_R_factor_all           0.0730
_refine_ls_R_factor_gt            0.0608
_refine_ls_wR_factor_ref          0.2297
_refine_ls_wR_factor_gt           0.2165
_refine_ls_goodness_of_fit_ref    0.926
_refine_ls_restrained_S_all       0.926
_refine_ls_shift/su_max           0.001
_refine_ls_shift/su_mean          0.000
 
loop_
 _atom_site_label
 _atom_site_type_symbol
 _atom_site_fract_x
 _atom_site_fract_y
 _atom_site_fract_z
 _atom_site_U_iso_or_equiv
 _atom_site_adp_type
 _atom_site_occupancy
 _atom_site_symmetry_multiplicity
 _atom_site_calc_flag
 _atom_site_refinement_flags
 _atom_site_disorder_assembly
 _atom_site_disorder_group
C1 C 0.2836(8) 0.4707(5) 0.3491(4) 0.0369(13) Uani 1 1 d . . .
H1A H 0.3197 0.4828 0.4000 0.044 Uiso 1 1 calc R . .
H1B H 0.1664 0.4785 0.3692 0.044 Uiso 1 1 calc R . .
C2 C 0.3721(8) 0.3418(5) 0.3368(5) 0.0425(15) Uani 1 1 d . . .
H2A H 0.4867 0.3386 0.3074 0.051 Uiso 1 1 calc R . .
H2B H 0.3683 0.2800 0.4006 0.051 Uiso 1 1 calc R . .
C3 C 0.2299(7) 1.0197(5) 0.1606(4) 0.0356(13) Uani 1 1 d . . .
H3A H 0.3092 1.0575 0.1646 0.043 Uiso 1 1 calc R . .
H3B H 0.2759 0.9823 0.1064 0.043 Uiso 1 1 calc R . .
C4 C 0.0748(9) 1.1199(6) 0.1425(6) 0.0560(18) Uani 1 1 d . . .
H4A H 0.0991 1.1803 0.0797 0.067 Uiso 1 1 calc R . .
H4B H -0.0014 1.0805 0.1371 0.067 Uiso 1 1 calc R . .
C5 C 0.2747(7) -0.0017(5) 0.4671(4) 0.0338(12) Uani 1 1 d . . .
H5A H 0.3222 -0.0667 0.5207 0.041 Uiso 1 1 calc R . .
H5B H 0.2306 -0.0413 0.4367 0.041 Uiso 1 1 calc R . .
C6 C 0.1424(7) 0.0964(6) 0.5046(4) 0.0364(13) Uani 1 1 d . . .
H6A H 0.0664 0.0574 0.5587 0.044 Uiso 1 1 calc R . .
H6B H 0.1880 0.1423 0.5286 0.044 Uiso 1 1 calc R . .
C7 C -0.0651(7) 0.2777(6) 0.4624(4) 0.0407(14) Uani 1 1 d . . .
H7A H -0.0176 0.3301 0.4785 0.049 Uiso 1 1 calc R . .
H7B H -0.1380 0.2424 0.5207 0.049 Uiso 1 1 calc R . .
C8 C -0.1588(7) 0.3559(6) 0.3832(4) 0.0419(15) Uani 1 1 d . . .
H8A H -0.2027 0.3030 0.3652 0.050 Uiso 1 1 calc R . .
H8B H -0.2501 0.4214 0.4053 0.050 Uiso 1 1 calc R . .
C9 C -0.1347(7) 0.4875(5) 0.2249(4) 0.0385(14) Uani 1 1 d . . .
H9A H -0.2284 0.5522 0.2464 0.046 Uiso 1 1 calc R . .
H9B H -0.1744 0.4360 0.2029 0.046 Uiso 1 1 calc R . .
C10 C -0.0196(7) 0.5474(5) 0.1447(4) 0.0325(12) Uani 1 1 d . . .
H10A H -0.0764 0.6051 0.0923 0.039 Uiso 1 1 calc R . .
H10B H 0.0230 0.5963 0.1676 0.039 Uiso 1 1 calc R . .
C11 C 0.2208(7) 0.5084(6) 0.0307(4) 0.0391(14) Uani 1 1 d . . .
H11A H 0.2685 0.5566 0.0511 0.047 Uiso 1 1 calc R . .
H11B H 0.1637 0.5658 -0.0217 0.047 Uiso 1 1 calc R . .
C12 C 0.3509(7) 0.4067(7) -0.0043(4) 0.0446(15) Uani 1 1 d . . .
H12A H 0.3025 0.3532 -0.0183 0.053 Uiso 1 1 calc R . .
H12B H 0.4201 0.4430 -0.0643 0.053 Uiso 1 1 calc R . .
C13 C 0.5574(7) 0.2277(6) 0.0422(4) 0.0408(14) Uani 1 1 d . . .
H13A H 0.6294 0.2536 -0.0199 0.049 Uiso 1 1 calc R . .
H13B H 0.4990 0.1754 0.0351 0.049 Uiso 1 1 calc R . .
C14 C 0.6561(7) 0.1536(6) 0.1191(4) 0.0403(14) Uani 1 1 d . . .
H14A H 0.7418 0.0839 0.0988 0.048 Uiso 1 1 calc R . .
H14B H 0.7079 0.2074 0.1300 0.048 Uiso 1 1 calc R . .
C15 C 0.6379(7) 0.0238(5) 0.2794(4) 0.0354(13) Uani 1 1 d . . .
H15A H 0.6807 0.0709 0.3039 0.042 Uiso 1 1 calc R . .
H15B H 0.7297 -0.0390 0.2542 0.042 Uiso 1 1 calc R . .
C16 C 0.5233(7) -0.0388(5) 0.3582(4) 0.0314(12) Uani 1 1 d . . .
H16A H 0.4772 -0.0827 0.3326 0.038 Uiso 1 1 calc R . .
H16B H 0.5814 -0.1011 0.4086 0.038 Uiso 1 1 calc R . .
N1 N 0.0569(6) 0.8258(4) 0.1300(3) 0.0319(10) Uani 1 1 d . . .
N2 N -0.0433(6) 0.7124(4) 0.3310(3) 0.0328(10) Uani 1 1 d . . .
N3 N 0.5526(6) 0.7828(4) 0.1757(4) 0.0353(11) Uani 1 1 d . . .
N4 N 0.4584(5) 0.6724(4) 0.3791(3) 0.0322(10) Uani 1 1 d . . .
N5 N 0.3012(5) 0.3075(4) 0.2753(3) 0.0346(11) Uani 1 1 d . . .
H5C H 0.2174 0.3603 0.2510 0.042 Uiso 1 1 calc R . .
H5D H 0.3433 0.2346 0.2634 0.042 Uiso 1 1 calc R . .
N6 N -0.0031(9) 1.1858(6) 0.2101(6) 0.085(2) Uani 1 1 d . . .
H6C H 0.0378 1.1687 0.2608 0.102 Uiso 1 1 calc R . .
H6D H -0.0934 1.2447 0.2022 0.102 Uiso 1 1 calc R . .
O1 O 0.0046(6) 0.8670(5) 0.0595(3) 0.0547(12) Uani 1 1 d . . .
O2 O -0.1509(6) 0.6764(5) 0.3856(4) 0.0624(14) Uani 1 1 d . . .
O3 O 0.6552(6) 0.8246(5) 0.1195(4) 0.0660(15) Uani 1 1 d . . .
O4 O 0.5046(6) 0.6431(5) 0.4515(3) 0.0541(13) Uani 1 1 d . . .
O5 O 0.3969(4) 0.0517(3) 0.3981(3) 0.0302(8) Uani 1 1 d . . .
O6 O 0.0592(5) 0.1802(4) 0.4305(3) 0.0367(9) Uani 1 1 d . . .
O7 O -0.0531(4) 0.4108(4) 0.3030(3) 0.0343(9) Uani 1 1 d . . .
O8 O 0.1102(5) 0.4553(3) 0.1094(3) 0.0326(9) Uani 1 1 d . . .
O9 O 0.4454(5) 0.3343(4) 0.0673(3) 0.0392(10) Uani 1 1 d . . .
O10 O 0.5525(4) 0.1068(4) 0.2047(3) 0.0348(9) Uani 1 1 d . . .
S1 S 0.32240(16) 0.59181(12) 0.23580(9) 0.0271(3) Uani 1 1 d . . .
S2 S 0.19365(15) 0.89702(12) 0.27320(9) 0.0261(3) Uani 1 1 d . . .
Fe1 Fe 0.09899(8) 0.76249(7) 0.24034(5) 0.0253(3) Uani 1 1 d . . .
Fe2 Fe 0.41641(8) 0.72941(6) 0.26872(5) 0.0258(3) Uani 1 1 d . . .
 
loop_
 _atom_site_aniso_label
 _atom_site_aniso_U_11
 _atom_site_aniso_U_22
 _atom_site_aniso_U_33
 _atom_site_aniso_U_23
 _atom_site_aniso_U_13
 _atom_site_aniso_U_12
C1 0.052(4) 0.030(3) 0.031(3) -0.005(2) -0.011(3) -0.015(3)
C2 0.054(4) 0.023(3) 0.055(4) -0.004(3) -0.030(3) -0.007(3)
C3 0.039(3) 0.025(3) 0.042(3) -0.002(2) -0.011(3) -0.012(2)
C4 0.057(4) 0.032(3) 0.078(5) -0.009(3) -0.029(4) -0.003(3)
C5 0.037(3) 0.035(3) 0.025(3) -0.001(2) -0.008(2) -0.012(2)
C6 0.038(3) 0.041(3) 0.025(3) -0.005(2) -0.007(2) -0.007(3)
C7 0.032(3) 0.049(4) 0.029(3) -0.009(3) 0.004(2) -0.005(3)
C8 0.027(3) 0.050(4) 0.035(3) -0.010(3) 0.000(2) -0.002(3)
C9 0.029(3) 0.034(3) 0.041(3) -0.008(3) -0.014(2) 0.009(2)
C10 0.038(3) 0.024(3) 0.033(3) -0.006(2) -0.014(2) -0.001(2)
C11 0.039(3) 0.040(3) 0.029(3) 0.003(2) -0.008(2) -0.010(3)
C12 0.038(3) 0.061(4) 0.025(3) -0.008(3) -0.007(2) -0.004(3)
C13 0.029(3) 0.052(4) 0.031(3) -0.008(3) 0.001(2) -0.008(3)
C14 0.023(3) 0.050(4) 0.037(3) -0.011(3) 0.000(2) -0.005(3)
C15 0.025(3) 0.033(3) 0.042(3) -0.011(3) -0.010(2) 0.003(2)
C16 0.033(3) 0.022(3) 0.036(3) -0.010(2) -0.010(2) 0.003(2)
N1 0.035(2) 0.027(2) 0.032(2) -0.0062(19) -0.007(2) -0.0089(19)
N2 0.029(2) 0.030(2) 0.041(3) -0.017(2) -0.001(2) -0.007(2)
N3 0.027(2) 0.030(3) 0.044(3) -0.016(2) 0.002(2) -0.004(2)
N4 0.029(2) 0.028(2) 0.038(3) -0.003(2) -0.010(2) -0.0093(19)
N5 0.037(3) 0.026(2) 0.041(3) -0.010(2) -0.016(2) -0.002(2)
N6 0.087(5) 0.060(4) 0.113(6) -0.039(4) -0.045(5) 0.013(4)
O1 0.062(3) 0.062(3) 0.037(2) 0.002(2) -0.023(2) -0.019(2)
O2 0.047(3) 0.073(4) 0.070(3) -0.031(3) 0.021(3) -0.035(3)
O3 0.051(3) 0.067(3) 0.073(3) -0.023(3) 0.022(3) -0.032(3)
O4 0.046(3) 0.068(3) 0.042(3) 0.004(2) -0.020(2) -0.019(2)
O5 0.0283(19) 0.0229(18) 0.035(2) -0.0090(15) -0.0036(16) -0.0027(15)
O6 0.034(2) 0.042(2) 0.0257(19) -0.0097(17) -0.0054(16) 0.0000(18)
O7 0.0257(19) 0.040(2) 0.0294(19) -0.0068(17) -0.0055(16) -0.0019(16)
O8 0.033(2) 0.0253(19) 0.033(2) -0.0081(16) -0.0036(16) -0.0027(16)
O9 0.034(2) 0.047(2) 0.030(2) -0.0070(18) -0.0080(17) -0.0062(18)
O10 0.0224(18) 0.038(2) 0.035(2) -0.0059(17) -0.0053(16) -0.0007(16)
S1 0.0319(7) 0.0221(7) 0.0264(7) -0.0095(5) -0.0020(5) -0.0066(5)
S2 0.0254(7) 0.0243(7) 0.0293(7) -0.0117(5) -0.0036(5) -0.0048(5)
Fe1 0.0248(4) 0.0242(4) 0.0276(4) -0.0096(3) -0.0044(3) -0.0056(3)
Fe2 0.0225(4) 0.0231(4) 0.0307(5) -0.0091(3) -0.0037(3) -0.0043(3)
 
_geom_special_details
;
 All esds (except the esd in the dihedral angle between two l.s. planes)
 are estimated using the full covariance matrix.  The cell esds are taken
 into account individually in the estimation of esds in distances, angles
 and torsion angles; correlations between esds in cell parameters are only
 used when they are defined by crystal symmetry.  An approximate (isotropic)
 treatment of cell esds is used for estimating esds involving l.s. planes.
;
 
loop_
 _geom_bond_atom_site_label_1
 _geom_bond_atom_site_label_2
 _geom_bond_distance
 _geom_bond_site_symmetry_2
 _geom_bond_publ_flag
C1 C2 1.517(8) . ?
C1 S1 1.848(6) . ?
C1 H1A 0.9900 . ?
C1 H1B 0.9900 . ?
C2 N5 1.496(7) . ?
C2 H2A 0.9900 . ?
C2 H2B 0.9900 . ?
C3 C4 1.516(8) . ?
C3 S2 1.847(6) . ?
C3 H3A 0.9900 . ?
C3 H3B 0.9900 . ?
C4 N6 1.387(10) . ?
C4 H4A 0.9900 . ?
C4 H4B 0.9900 . ?
C5 O5 1.431(7) . ?
C5 C6 1.491(8) . ?
C5 H5A 0.9900 . ?
C5 H5B 0.9900 . ?
C6 O6 1.419(6) . ?
C6 H6A 0.9900 . ?
C6 H6B 0.9900 . ?
C7 O6 1.422(7) . ?
C7 C8 1.515(8) . ?
C7 H7A 0.9900 . ?
C7 H7B 0.9900 . ?
C8 O7 1.416(7) . ?
C8 H8A 0.9900 . ?
C8 H8B 0.9900 . ?
C9 O7 1.439(6) . ?
C9 C10 1.492(8) . ?
C9 H9A 0.9900 . ?
C9 H9B 0.9900 . ?
C10 O8 1.422(7) . ?
C10 H10A 0.9900 . ?
C10 H10B 0.9900 . ?
C11 O8 1.423(7) . ?
C11 C12 1.495(9) . ?
C11 H11A 0.9900 . ?
C11 H11B 0.9900 . ?
C12 O9 1.424(7) . ?
C12 H12A 0.9900 . ?
C12 H12B 0.9900 . ?
C13 O9 1.417(7) . ?
C13 C14 1.509(8) . ?
C13 H13A 0.9900 . ?
C13 H13B 0.9900 . ?
C14 O10 1.418(7) . ?
C14 H14A 0.9900 . ?
C14 H14B 0.9900 . ?
C15 O10 1.434(6) . ?
C15 C16 1.493(8) . ?
C15 H15A 0.9900 . ?
C15 H15B 0.9900 . ?
C16 O5 1.427(6) . ?
C16 H16A 0.9900 . ?
C16 H16B 0.9900 . ?
N1 O1 1.173(6) . ?
N1 Fe1 1.676(5) . ?
N2 O2 1.173(6) . ?
N2 Fe1 1.676(5) . ?
N3 O3 1.177(7) . ?
N3 Fe2 1.672(5) . ?
N4 O4 1.184(6) . ?
N4 Fe2 1.675(5) . ?
N5 H5C 0.8800 . ?
N5 H5D 0.8800 . ?
N6 H6C 0.8800 . ?
N6 H6D 0.8800 . ?
S1 Fe1 2.3223(15) . ?
S1 Fe2 2.3285(15) . ?
S2 Fe2 2.2976(15) . ?
S2 Fe1 2.2989(15) . ?
Fe1 Fe2 2.8867(13) . ?
 
loop_
 _geom_angle_atom_site_label_1
 _geom_angle_atom_site_label_2
 _geom_angle_atom_site_label_3
 _geom_angle
 _geom_angle_site_symmetry_1
 _geom_angle_site_symmetry_3
 _geom_angle_publ_flag
C2 C1 S1 110.8(4) . . ?
C2 C1 H1A 109.5 . . ?
S1 C1 H1A 109.5 . . ?
C2 C1 H1B 109.5 . . ?
S1 C1 H1B 109.5 . . ?
H1A C1 H1B 108.1 . . ?
N5 C2 C1 112.3(5) . . ?
N5 C2 H2A 109.1 . . ?
C1 C2 H2A 109.1 . . ?
N5 C2 H2B 109.1 . . ?
C1 C2 H2B 109.1 . . ?
H2A C2 H2B 107.9 . . ?
C4 C3 S2 111.1(4) . . ?
C4 C3 H3A 109.4 . . ?
S2 C3 H3A 109.4 . . ?
C4 C3 H3B 109.4 . . ?
S2 C3 H3B 109.4 . . ?
H3A C3 H3B 108.0 . . ?
N6 C4 C3 117.2(6) . . ?
N6 C4 H4A 108.0 . . ?
C3 C4 H4A 108.0 . . ?
N6 C4 H4B 108.0 . . ?
C3 C4 H4B 108.0 . . ?
H4A C4 H4B 107.2 . . ?
O5 C5 C6 110.2(5) . . ?
O5 C5 H5A 109.6 . . ?
C6 C5 H5A 109.6 . . ?
O5 C5 H5B 109.6 . . ?
C6 C5 H5B 109.6 . . ?
H5A C5 H5B 108.1 . . ?
O6 C6 C5 109.7(4) . . ?
O6 C6 H6A 109.7 . . ?
C5 C6 H6A 109.7 . . ?
O6 C6 H6B 109.7 . . ?
C5 C6 H6B 109.7 . . ?
H6A C6 H6B 108.2 . . ?
O6 C7 C8 108.7(5) . . ?
O6 C7 H7A 109.9 . . ?
C8 C7 H7A 109.9 . . ?
O6 C7 H7B 109.9 . . ?
C8 C7 H7B 109.9 . . ?
H7A C7 H7B 108.3 . . ?
O7 C8 C7 108.4(5) . . ?
O7 C8 H8A 110.0 . . ?
C7 C8 H8A 110.0 . . ?
O7 C8 H8B 110.0 . . ?
C7 C8 H8B 110.0 . . ?
H8A C8 H8B 108.4 . . ?
O7 C9 C10 108.9(5) . . ?
O7 C9 H9A 109.9 . . ?
C10 C9 H9A 109.9 . . ?
O7 C9 H9B 109.9 . . ?
C10 C9 H9B 109.9 . . ?
H9A C9 H9B 108.3 . . ?
O8 C10 C9 110.2(4) . . ?
O8 C10 H10A 109.6 . . ?
C9 C10 H10A 109.6 . . ?
O8 C10 H10B 109.6 . . ?
C9 C10 H10B 109.6 . . ?
H10A C10 H10B 108.1 . . ?
O8 C11 C12 109.2(5) . . ?
O8 C11 H11A 109.8 . . ?
C12 C11 H11A 109.8 . . ?
O8 C11 H11B 109.8 . . ?
C12 C11 H11B 109.8 . . ?
H11A C11 H11B 108.3 . . ?
O9 C12 C11 109.3(5) . . ?
O9 C12 H12A 109.8 . . ?
C11 C12 H12A 109.8 . . ?
O9 C12 H12B 109.8 . . ?
C11 C12 H12B 109.8 . . ?
H12A C12 H12B 108.3 . . ?
O9 C13 C14 109.8(5) . . ?
O9 C13 H13A 109.7 . . ?
C14 C13 H13A 109.7 . . ?
O9 C13 H13B 109.7 . . ?
C14 C13 H13B 109.7 . . ?
H13A C13 H13B 108.2 . . ?
O10 C14 C13 108.5(4) . . ?
O10 C14 H14A 110.0 . . ?
C13 C14 H14A 110.0 . . ?
O10 C14 H14B 110.0 . . ?
C13 C14 H14B 110.0 . . ?
H14A C14 H14B 108.4 . . ?
O10 C15 C16 108.2(4) . . ?
O10 C15 H15A 110.1 . . ?
C16 C15 H15A 110.1 . . ?
O10 C15 H15B 110.1 . . ?
C16 C15 H15B 110.1 . . ?
H15A C15 H15B 108.4 . . ?
O5 C16 C15 109.7(4) . . ?
O5 C16 H16A 109.7 . . ?
C15 C16 H16A 109.7 . . ?
O5 C16 H16B 109.7 . . ?
C15 C16 H16B 109.7 . . ?
H16A C16 H16B 108.2 . . ?
O1 N1 Fe1 169.6(5) . . ?
O2 N2 Fe1 171.4(5) . . ?
O3 N3 Fe2 170.5(5) . . ?
O4 N4 Fe2 169.7(4) . . ?
C2 N5 H5C 120.0 . . ?
C2 N5 H5D 120.0 . . ?
H5C N5 H5D 120.0 . . ?
C4 N6 H6C 120.0 . . ?
C4 N6 H6D 120.0 . . ?
H6C N6 H6D 120.0 . . ?
C16 O5 C5 111.9(4) . . ?
C6 O6 C7 111.6(4) . . ?
C8 O7 C9 111.4(4) . . ?
C10 O8 C11 112.2(4) . . ?
C12 O9 C13 111.1(4) . . ?
C14 O10 C15 112.8(4) . . ?
C1 S1 Fe1 106.1(2) . . ?
C1 S1 Fe2 107.66(19) . . ?
Fe1 S1 Fe2 76.73(5) . . ?
C3 S2 Fe2 106.6(2) . . ?
C3 S2 Fe1 107.71(19) . . ?
Fe2 S2 Fe1 77.81(5) . . ?
N2 Fe1 N1 118.4(2) . . ?
N2 Fe1 S2 111.54(16) . . ?
N1 Fe1 S2 108.43(16) . . ?
N2 Fe1 S1 106.54(16) . . ?
N1 Fe1 S1 107.91(16) . . ?
S2 Fe1 S1 102.80(5) . . ?
N2 Fe1 Fe2 121.61(17) . . ?
N1 Fe1 Fe2 119.90(16) . . ?
S2 Fe1 Fe2 51.08(4) . . ?
S1 Fe1 Fe2 51.73(4) . . ?
N3 Fe2 N4 119.6(2) . . ?
N3 Fe2 S2 105.16(16) . . ?
N4 Fe2 S2 106.51(17) . . ?
N3 Fe2 S1 110.71(17) . . ?
N4 Fe2 S1 110.58(16) . . ?
S2 Fe2 S1 102.65(6) . . ?
N3 Fe2 Fe1 119.38(18) . . ?
N4 Fe2 Fe1 120.65(16) . . ?
S2 Fe2 Fe1 51.12(4) . . ?
S1 Fe2 Fe1 51.54(4) . . ?
 
_diffrn_measured_fraction_theta_max    0.977
_diffrn_reflns_theta_full              25.00
_diffrn_measured_fraction_theta_full   0.977
_refine_diff_density_max    1.529
_refine_diff_density_min   -0.582
_refine_diff_density_rms    0.149

*****************************************************

data_complex_4
 
_audit_creation_method            SHELXL-97
_chemical_name_systematic
;
 ?
;
_chemical_name_common             ?
_chemical_melting_point           ?
_chemical_formula_moiety          'C16 H37 Fe N4 O8 S2'
_chemical_formula_sum             'C16 H37 Fe N4 O8 S2'
_chemical_formula_weight          533.47
 
loop_
 _atom_type_symbol
 _atom_type_description
 _atom_type_scat_dispersion_real
 _atom_type_scat_dispersion_imag
 _atom_type_scat_source
 'C'  'C'   0.0033   0.0016
 'International Tables Vol C Tables 4.2.6.8 and 6.1.1.4'
 'H'  'H'   0.0000   0.0000
 'International Tables Vol C Tables 4.2.6.8 and 6.1.1.4'
 'N'  'N'   0.0061   0.0033
 'International Tables Vol C Tables 4.2.6.8 and 6.1.1.4'
 'O'  'O'   0.0106   0.0060
 'International Tables Vol C Tables 4.2.6.8 and 6.1.1.4'
 'S'  'S'   0.1246   0.1234
 'International Tables Vol C Tables 4.2.6.8 and 6.1.1.4'
 'Fe'  'Fe'   0.3463   0.8444
 'International Tables Vol C Tables 4.2.6.8 and 6.1.1.4'
 
_symmetry_cell_setting            monoclinic
_symmetry_space_group_name_H-M    'P 21/n'
 
loop_
 _symmetry_equiv_pos_as_xyz
 'x, y, z'
 '-x+1/2, y+1/2, -z+1/2'
 '-x, -y, -z'
 'x-1/2, -y-1/2, z-1/2'
 
_cell_length_a                    10.6804(6)
_cell_length_b                    14.6441(11)
_cell_length_c                    16.5578(9)
_cell_angle_alpha                 90.00
_cell_angle_beta                  103.811(4)
_cell_angle_gamma                 90.00
_cell_volume                      2514.8(3)
_cell_formula_units_Z             4
_cell_measurement_temperature     200(2)
_cell_measurement_reflns_used     0
_cell_measurement_theta_min       0
_cell_measurement_theta_max       0
 
_exptl_crystal_description        prism
_exptl_crystal_colour             green(dark)
_exptl_crystal_size_max           0.68
_exptl_crystal_size_mid           0.45
_exptl_crystal_size_min           0.09
_exptl_crystal_density_meas       ?
_exptl_crystal_density_diffrn     1.409
_exptl_crystal_density_method     'not measured'
_exptl_crystal_F_000              1132
_exptl_absorpt_coefficient_mu     0.811
_exptl_absorpt_correction_type    multi-scan
_exptl_absorpt_correction_T_min   0.6085
_exptl_absorpt_correction_T_max   0.9306
_exptl_absorpt_process_details    ?
 
_exptl_special_details
;
 ?
;
 
_diffrn_ambient_temperature       200(2)
_diffrn_radiation_wavelength      0.71073
_diffrn_radiation_type            MoK\a
_diffrn_radiation_source          'fine-focus sealed tube'
_diffrn_radiation_monochromator   graphite
_diffrn_measurement_device_type   ?
_diffrn_measurement_method        ?
_diffrn_detector_area_resol_mean  ?
_diffrn_standards_number          ?
_diffrn_standards_interval_count  ?
_diffrn_standards_interval_time   ?
_diffrn_standards_decay_%         ?
_diffrn_reflns_number             14202
_diffrn_reflns_av_R_equivalents   0.0537
_diffrn_reflns_av_sigmaI/netI     0.0597
_diffrn_reflns_limit_h_min        -12
_diffrn_reflns_limit_h_max        12
_diffrn_reflns_limit_k_min        -10
_diffrn_reflns_limit_k_max        17
_diffrn_reflns_limit_l_min        -19
_diffrn_reflns_limit_l_max        19
_diffrn_reflns_theta_min          1.88
_diffrn_reflns_theta_max          25.03
_reflns_number_total              4417
_reflns_number_gt                 3077
_reflns_threshold_expression      >2sigma(I)
 
_computing_data_collection        ?
_computing_cell_refinement        ?
_computing_data_reduction         ?
_computing_structure_solution     'SHELXS-86 (Sheldrick, 1986)'
_computing_structure_refinement   'SHELXL-97 (Sheldrick, 1997)'
_computing_molecular_graphics     'Ortep-3 for Windows (Farrugia, 1997)'
_computing_publication_material   'WinGX publication routines (Farrugia, 1999)'
 
_refine_special_details
;
 Refinement of F^2^ against ALL reflections.  The weighted R-factor wR and
 goodness of fit S are based on F^2^, conventional R-factors R are based
 on F, with F set to zero for negative F^2^. The threshold expression of
 F^2^ > 2sigma(F^2^) is used only for calculating R-factors(gt) etc. and is
 not relevant to the choice of reflections for refinement.  R-factors based
 on F^2^ are statistically about twice as large as those based on F, and R-
 factors based on ALL data will be even larger.
;
 
_refine_ls_structure_factor_coef  Fsqd
_refine_ls_matrix_type            full
_refine_ls_weighting_scheme       calc
_refine_ls_weighting_details
 'calc w=1/[\s^2^(Fo^2^)+(0.0485P)^2^+0.8892P] where P=(Fo^2^+2Fc^2^)/3'
_atom_sites_solution_primary      direct
_atom_sites_solution_secondary    difmap
_atom_sites_solution_hydrogens    geom
_refine_ls_hydrogen_treatment     constr
_refine_ls_extinction_method      none
_refine_ls_extinction_coef        ?
_refine_ls_number_reflns          4417
_refine_ls_number_parameters      289
_refine_ls_number_restraints      1
_refine_ls_R_factor_all           0.0751
_refine_ls_R_factor_gt            0.0436
_refine_ls_wR_factor_ref          0.1147
_refine_ls_wR_factor_gt           0.0997
_refine_ls_goodness_of_fit_ref    1.012
_refine_ls_restrained_S_all       1.012
_refine_ls_shift/su_max           0.021
_refine_ls_shift/su_mean          0.001
 
loop_
 _atom_site_label
 _atom_site_type_symbol
 _atom_site_fract_x
 _atom_site_fract_y
 _atom_site_fract_z
 _atom_site_U_iso_or_equiv
 _atom_site_adp_type
 _atom_site_occupancy
 _atom_site_symmetry_multiplicity
 _atom_site_calc_flag
 _atom_site_refinement_flags
 _atom_site_disorder_assembly
 _atom_site_disorder_group
C1 C 0.1044(3) 0.6838(3) 0.15547(19) 0.0477(9) Uani 1 1 d . . .
H1A H 0.1179 0.6620 0.2135 0.057 Uiso 1 1 calc R . .
H1B H 0.0835 0.6300 0.1185 0.057 Uiso 1 1 calc R . .
C2 C 0.2282(3) 0.7246(3) 0.14452(17) 0.0430(9) Uani 1 1 d . . .
H2A H 0.2481 0.7801 0.1794 0.052 Uiso 1 1 calc R . .
H2B H 0.2992 0.6804 0.1639 0.052 Uiso 1 1 calc R . .
C3' C -0.0566(8) 0.6738(7) 0.3416(6) 0.0443(11) Uani 0.35 1 d PD A 1
H3'1 H -0.0404 0.6339 0.2969 0.053 Uiso 0.35 1 calc PR A 1
H3'2 H -0.0439 0.6363 0.3927 0.053 Uiso 0.35 1 calc PR A 1
C4' C -0.190(4) 0.703(5) 0.319(4) 0.0497(17) Uani 0.35 1 d PD A 1
H4'1 H -0.2485 0.6495 0.3130 0.060 Uiso 0.35 1 calc PR A 1
H4'2 H -0.2083 0.7368 0.2655 0.060 Uiso 0.35 1 calc PR A 1
N4' N -0.2053(9) 0.7669(6) 0.3934(5) 0.0645(12) Uani 0.35 1 d P A 1
H4'3 H -0.1390 0.7768 0.4356 0.077 Uiso 0.35 1 calc PR A 1
H4'4 H -0.2802 0.7925 0.3924 0.077 Uiso 0.35 1 calc PR A 1
C3 C -0.0850(5) 0.7508(4) 0.3890(3) 0.0443(11) Uani 0.65 1 d PD A 2
H3A H -0.0694 0.7145 0.4409 0.053 Uiso 0.65 1 calc PR A 2
H3B H -0.1205 0.8106 0.4004 0.053 Uiso 0.65 1 calc PR A 2
C4 C -0.179(2) 0.704(3) 0.326(2) 0.0497(17) Uani 0.65 1 d PD A 2
H4A H -0.2055 0.7443 0.2762 0.060 Uiso 0.65 1 calc PR A 2
H4B H -0.2567 0.6911 0.3467 0.060 Uiso 0.65 1 calc PR A 2
N4 N -0.1243(5) 0.6175(4) 0.3020(3) 0.0645(12) Uani 0.65 1 d P A 2
H4C H -0.0447 0.6017 0.3263 0.077 Uiso 0.65 1 calc PR A 2
H4D H -0.1715 0.5819 0.2637 0.077 Uiso 0.65 1 calc PR A 2
C5 C 0.5016(3) 0.8996(3) 0.1229(2) 0.0516(9) Uani 1 1 d . . .
H5A H 0.4707 0.8924 0.1743 0.062 Uiso 1 1 calc R . .
H5B H 0.5541 0.9559 0.1278 0.062 Uiso 1 1 calc R . .
C6 C 0.5812(3) 0.8184(3) 0.1110(2) 0.0523(9) Uani 1 1 d . . .
H6A H 0.6044 0.8225 0.0567 0.063 Uiso 1 1 calc R . .
H6B H 0.6618 0.8166 0.1554 0.063 Uiso 1 1 calc R . .
C7 C 0.5709(3) 0.6583(2) 0.09494(19) 0.0425(8) Uani 1 1 d . . .
H7A H 0.6556 0.6516 0.1350 0.051 Uiso 1 1 calc R . .
H7B H 0.5859 0.6635 0.0384 0.051 Uiso 1 1 calc R . .
C8 C 0.4891(3) 0.5766(2) 0.09956(18) 0.0407(8) Uani 1 1 d . . .
H8A H 0.5373 0.5201 0.0940 0.049 Uiso 1 1 calc R . .
H8B H 0.4660 0.5751 0.1540 0.049 Uiso 1 1 calc R . .
C9 C 0.2914(3) 0.5064(2) 0.03480(18) 0.0392(8) Uani 1 1 d . . .
H9A H 0.2544 0.5100 0.0841 0.047 Uiso 1 1 calc R . .
H9B H 0.3399 0.4484 0.0376 0.047 Uiso 1 1 calc R . .
C10 C 0.1855(3) 0.5094(2) -0.04357(19) 0.0419(8) Uani 1 1 d . . .
H10A H 0.2230 0.5130 -0.0927 0.050 Uiso 1 1 calc R . .
H10B H 0.1326 0.4533 -0.0483 0.050 Uiso 1 1 calc R . .
C11 C 0.0099(3) 0.5999(3) -0.11590(19) 0.0524(10) Uani 1 1 d . . .
H11A H -0.0454 0.5449 -0.1272 0.063 Uiso 1 1 calc R . .
H11B H 0.0508 0.6088 -0.1631 0.063 Uiso 1 1 calc R . .
C12 C -0.0701(3) 0.6816(3) -0.1072(2) 0.0545(10) Uani 1 1 d . . .
H12A H -0.1460 0.6852 -0.1550 0.065 Uiso 1 1 calc R . .
H12B H -0.1013 0.6767 -0.0556 0.065 Uiso 1 1 calc R . .
C13 C -0.0632(3) 0.8416(3) -0.0962(2) 0.0497(9) Uani 1 1 d . . .
H13A H -0.0909 0.8404 -0.0432 0.060 Uiso 1 1 calc R . .
H13B H -0.1411 0.8459 -0.1425 0.060 Uiso 1 1 calc R . .
C14 C 0.0226(3) 0.9216(3) -0.09765(19) 0.0480(9) Uani 1 1 d . . .
H14A H 0.0577 0.9188 -0.1478 0.058 Uiso 1 1 calc R . .
H14B H -0.0274 0.9789 -0.0999 0.058 Uiso 1 1 calc R . .
C15 C 0.2187(3) 0.9892(2) -0.02812(19) 0.0474(9) Uani 1 1 d . . .
H15A H 0.1771 1.0500 -0.0352 0.057 Uiso 1 1 calc R . .
H15B H 0.2568 0.9780 -0.0762 0.057 Uiso 1 1 calc R . .
C16 C 0.3225(3) 0.9872(2) 0.05095(19) 0.0483(9) Uani 1 1 d . . .
H16A H 0.3794 1.0410 0.0536 0.058 Uiso 1 1 calc R . .
H16B H 0.2834 0.9892 0.0995 0.058 Uiso 1 1 calc R . .
N1 N 0.1495(2) 0.9206(2) 0.24791(14) 0.0390(7) Uani 1 1 d . . .
N2 N -0.1181(2) 0.9136(2) 0.24694(14) 0.0418(7) Uani 1 1 d . . .
N3 N 0.2215(2) 0.74915(18) 0.05578(13) 0.0354(6) Uani 1 1 d . . .
H3C H 0.2977 0.7743 0.0518 0.053 Uiso 1 1 calc R . .
H3D H 0.1567 0.7901 0.0378 0.053 Uiso 1 1 calc R . .
H3E H 0.2059 0.6980 0.0238 0.053 Uiso 1 1 calc R . .
O1 O 0.2216(2) 0.98242(19) 0.25238(13) 0.0569(7) Uani 1 1 d . . .
O2 O -0.2023(2) 0.9613(2) 0.25419(16) 0.0684(8) Uani 1 1 d . . .
O3 O 0.39535(18) 0.90557(16) 0.05287(12) 0.0416(6) Uani 1 1 d . . .
O4 O 0.50775(18) 0.73819(16) 0.11396(12) 0.0399(5) Uani 1 1 d . . .
O5 O 0.37483(17) 0.58141(15) 0.03397(11) 0.0364(5) Uani 1 1 d . . .
O6 O 0.10708(18) 0.58773(15) -0.04059(11) 0.0394(5) Uani 1 1 d . . .
O7 O 0.00651(19) 0.76064(17) -0.10422(13) 0.0465(6) Uani 1 1 d . . .
O8 O 0.12580(19) 0.92100(16) -0.02479(12) 0.0440(6) Uani 1 1 d . . .
S2 S -0.03309(7) 0.76086(7) 0.13349(4) 0.0413(2) Uani 1 1 d . . .
S3 S 0.07137(7) 0.76999(7) 0.36121(5) 0.0505(3) Uani 1 1 d . . .
Fe1 Fe 0.01745(4) 0.85691(3) 0.24599(2) 0.03453(16) Uani 1 1 d . A .
 
loop_
 _atom_site_aniso_label
 _atom_site_aniso_U_11
 _atom_site_aniso_U_22
 _atom_site_aniso_U_33
 _atom_site_aniso_U_23
 _atom_site_aniso_U_13
 _atom_site_aniso_U_12
C1 0.057(2) 0.047(3) 0.0453(19) -0.0013(17) 0.0256(16) 0.0047(18)
C2 0.0445(17) 0.053(3) 0.0304(16) -0.0002(16) 0.0069(13) 0.0128(16)
C3' 0.049(2) 0.043(3) 0.044(3) 0.001(2) 0.018(2) -0.005(2)
C4' 0.045(4) 0.053(3) 0.048(5) 0.010(4) 0.005(3) -0.018(3)
N4' 0.070(3) 0.051(3) 0.066(3) -0.008(2) 0.003(2) -0.008(2)
C3 0.049(2) 0.043(3) 0.044(3) 0.001(2) 0.018(2) -0.005(2)
C4 0.045(4) 0.053(3) 0.048(5) 0.010(4) 0.005(3) -0.018(3)
N4 0.070(3) 0.051(3) 0.066(3) -0.008(2) 0.003(2) -0.008(2)
C5 0.0495(19) 0.046(3) 0.0520(19) -0.0079(18) -0.0027(15) -0.0078(18)
C6 0.0362(17) 0.048(3) 0.066(2) -0.002(2) -0.0025(15) -0.0093(17)
C7 0.0348(16) 0.045(2) 0.0446(18) 0.0010(17) 0.0039(13) 0.0071(16)
C8 0.0365(16) 0.042(2) 0.0402(17) 0.0076(16) 0.0029(13) 0.0123(15)
C9 0.0451(17) 0.032(2) 0.0397(17) 0.0013(15) 0.0082(13) 0.0047(15)
C10 0.0454(17) 0.034(2) 0.0451(18) -0.0027(16) 0.0087(14) 0.0033(16)
C11 0.0467(19) 0.053(3) 0.0470(19) -0.0087(19) -0.0093(15) 0.0042(18)
C12 0.0374(17) 0.055(3) 0.061(2) -0.006(2) -0.0077(15) 0.0062(18)
C13 0.0404(17) 0.056(3) 0.0481(19) 0.0099(18) 0.0015(14) 0.0189(18)
C14 0.0477(18) 0.049(3) 0.0437(18) 0.0101(18) 0.0037(14) 0.0215(18)
C15 0.064(2) 0.029(2) 0.0483(19) 0.0059(17) 0.0129(16) 0.0088(17)
C16 0.068(2) 0.031(2) 0.0461(18) -0.0035(17) 0.0141(16) 0.0028(18)
N1 0.0412(14) 0.044(2) 0.0297(13) -0.0004(13) 0.0046(10) -0.0061(14)
N2 0.0396(14) 0.047(2) 0.0371(14) -0.0055(14) 0.0059(11) -0.0023(14)
N3 0.0348(13) 0.0353(18) 0.0357(13) 0.0012(12) 0.0074(10) 0.0041(12)
O1 0.0581(14) 0.062(2) 0.0461(13) 0.0033(13) 0.0037(11) -0.0252(14)
O2 0.0479(14) 0.076(2) 0.0767(17) -0.0263(16) 0.0058(12) 0.0148(15)
O3 0.0423(11) 0.0353(15) 0.0439(12) -0.0067(11) 0.0036(9) -0.0006(10)
O4 0.0360(11) 0.0381(15) 0.0438(12) -0.0023(11) 0.0057(9) 0.0021(10)
O5 0.0351(10) 0.0327(14) 0.0381(11) 0.0062(10) 0.0018(8) 0.0030(10)
O6 0.0379(11) 0.0394(15) 0.0369(11) -0.0060(10) 0.0012(8) 0.0049(10)
O7 0.0397(12) 0.0468(17) 0.0510(13) 0.0035(12) 0.0071(10) 0.0124(11)
O8 0.0482(12) 0.0393(16) 0.0416(12) 0.0098(11) 0.0052(9) 0.0092(11)
S2 0.0353(4) 0.0554(7) 0.0334(4) -0.0077(4) 0.0087(3) -0.0035(4)
S3 0.0393(4) 0.0715(8) 0.0372(4) 0.0138(4) 0.0019(3) -0.0098(4)
Fe1 0.0340(2) 0.0376(3) 0.0317(2) -0.0003(2) 0.00748(17) -0.0028(2)
 
_geom_special_details
;
 All esds (except the esd in the dihedral angle between two l.s. planes)
 are estimated using the full covariance matrix.  The cell esds are taken
 into account individually in the estimation of esds in distances, angles
 and torsion angles; correlations between esds in cell parameters are only
 used when they are defined by crystal symmetry.  An approximate (isotropic)
 treatment of cell esds is used for estimating esds involving l.s. planes.
;
 
loop_
 _geom_bond_atom_site_label_1
 _geom_bond_atom_site_label_2
 _geom_bond_distance
 _geom_bond_site_symmetry_2
 _geom_bond_publ_flag
C1 C2 1.501(4) . ?
C1 S2 1.819(3) . ?
C1 H1A 0.9900 . ?
C1 H1B 0.9900 . ?
C2 N3 1.497(3) . ?
C2 H2A 0.9900 . ?
C2 H2B 0.9900 . ?
C3' C4' 1.45(4) . ?
C3' S3 1.935(10) . ?
C3' H3'1 0.9900 . ?
C3' H3'2 0.9900 . ?
C4' N4' 1.59(6) . ?
C4' H4'1 0.9900 . ?
C4' H4'2 0.9900 . ?
N4' H4'3 0.8800 . ?
N4' H4'4 0.8800 . ?
C3 C4 1.44(2) . ?
C3 S3 1.857(5) . ?
C3 H3A 0.9900 . ?
C3 H3B 0.9900 . ?
C4 N4 1.49(3) . ?
C4 H4A 0.9900 . ?
C4 H4B 0.9900 . ?
N4 H4C 0.8800 . ?
N4 H4D 0.8800 . ?
C5 O3 1.418(3) . ?
C5 C6 1.502(5) . ?
C5 H5A 0.9900 . ?
C5 H5B 0.9900 . ?
C6 O4 1.420(4) . ?
C6 H6A 0.9900 . ?
C6 H6B 0.9900 . ?
C7 O4 1.423(4) . ?
C7 C8 1.494(4) . ?
C7 H7A 0.9900 . ?
C7 H7B 0.9900 . ?
C8 O5 1.429(3) . ?
C8 H8A 0.9900 . ?
C8 H8B 0.9900 . ?
C9 O5 1.416(4) . ?
C9 C10 1.505(4) . ?
C9 H9A 0.9900 . ?
C9 H9B 0.9900 . ?
C10 O6 1.428(4) . ?
C10 H10A 0.9900 . ?
C10 H10B 0.9900 . ?
C11 O6 1.430(3) . ?
C11 C12 1.498(5) . ?
C11 H11A 0.9900 . ?
C11 H11B 0.9900 . ?
C12 O7 1.411(4) . ?
C12 H12A 0.9900 . ?
C12 H12B 0.9900 . ?
C13 O7 1.423(4) . ?
C13 C14 1.492(5) . ?
C13 H13A 0.9900 . ?
C13 H13B 0.9900 . ?
C14 O8 1.427(3) . ?
C14 H14A 0.9900 . ?
C14 H14B 0.9900 . ?
C15 O8 1.419(4) . ?
C15 C16 1.500(4) . ?
C15 H15A 0.9900 . ?
C15 H15B 0.9900 . ?
C16 O3 1.423(4) . ?
C16 H16A 0.9900 . ?
C16 H16B 0.9900 . ?
N1 O1 1.180(3) . ?
N1 Fe1 1.685(3) . ?
N2 O2 1.168(3) . ?
N2 Fe1 1.672(3) . ?
N3 H3C 0.9100 . ?
N3 H3D 0.9100 . ?
N3 H3E 0.9100 . ?
S2 Fe1 2.2933(9) . ?
S3 Fe1 2.2510(9) . ?
 
loop_
 _geom_angle_atom_site_label_1
 _geom_angle_atom_site_label_2
 _geom_angle_atom_site_label_3
 _geom_angle
 _geom_angle_site_symmetry_1
 _geom_angle_site_symmetry_3
 _geom_angle_publ_flag
C2 C1 S2 114.9(3) . . ?
C2 C1 H1A 108.5 . . ?
S2 C1 H1A 108.5 . . ?
C2 C1 H1B 108.5 . . ?
S2 C1 H1B 108.5 . . ?
H1A C1 H1B 107.5 . . ?
N3 C2 C1 112.1(2) . . ?
N3 C2 H2A 109.2 . . ?
C1 C2 H2A 109.2 . . ?
N3 C2 H2B 109.2 . . ?
C1 C2 H2B 109.2 . . ?
H2A C2 H2B 107.9 . . ?
C4' C3' S3 116(3) . . ?
C4' C3' H3'1 108.2 . . ?
S3 C3' H3'1 108.2 . . ?
C4' C3' H3'2 108.3 . . ?
S3 C3' H3'2 108.2 . . ?
H3'1 C3' H3'2 107.4 . . ?
C3' C4' N4' 104(3) . . ?
C3' C4' H4'1 110.9 . . ?
N4' C4' H4'1 110.9 . . ?
C3' C4' H4'2 110.9 . . ?
N4' C4' H4'2 110.9 . . ?
H4'1 C4' H4'2 108.9 . . ?
C4' N4' H4'3 120.0 . . ?
C4' N4' H4'4 120.0 . . ?
H4'3 N4' H4'4 120.0 . . ?
C4 C3 S3 113.9(14) . . ?
C4 C3 H3A 108.8 . . ?
S3 C3 H3A 108.8 . . ?
C4 C3 H3B 108.8 . . ?
S3 C3 H3B 108.8 . . ?
H3A C3 H3B 107.7 . . ?
C3 C4 N4 110.1(14) . . ?
C3 C4 H4A 109.6 . . ?
N4 C4 H4A 109.6 . . ?
C3 C4 H4B 109.7 . . ?
N4 C4 H4B 109.7 . . ?
H4A C4 H4B 108.2 . . ?
C4 N4 H4C 120.0 . . ?
C4 N4 H4D 120.0 . . ?
H4C N4 H4D 120.0 . . ?
O3 C5 C6 108.0(3) . . ?
O3 C5 H5A 110.1 . . ?
C6 C5 H5A 110.1 . . ?
O3 C5 H5B 110.1 . . ?
C6 C5 H5B 110.1 . . ?
H5A C5 H5B 108.4 . . ?
O4 C6 C5 108.4(3) . . ?
O4 C6 H6A 110.0 . . ?
C5 C6 H6A 110.0 . . ?
O4 C6 H6B 110.0 . . ?
C5 C6 H6B 110.0 . . ?
H6A C6 H6B 108.4 . . ?
O4 C7 C8 109.4(2) . . ?
O4 C7 H7A 109.8 . . ?
C8 C7 H7A 109.8 . . ?
O4 C7 H7B 109.8 . . ?
C8 C7 H7B 109.8 . . ?
H7A C7 H7B 108.2 . . ?
O5 C8 C7 109.0(2) . . ?
O5 C8 H8A 109.9 . . ?
C7 C8 H8A 109.9 . . ?
O5 C8 H8B 109.9 . . ?
C7 C8 H8B 109.9 . . ?
H8A C8 H8B 108.3 . . ?
O5 C9 C10 108.3(2) . . ?
O5 C9 H9A 110.0 . . ?
C10 C9 H9A 110.0 . . ?
O5 C9 H9B 110.0 . . ?
C10 C9 H9B 110.0 . . ?
H9A C9 H9B 108.4 . . ?
O6 C10 C9 108.7(2) . . ?
O6 C10 H10A 110.0 . . ?
C9 C10 H10A 110.0 . . ?
O6 C10 H10B 110.0 . . ?
C9 C10 H10B 110.0 . . ?
H10A C10 H10B 108.3 . . ?
O6 C11 C12 109.1(3) . . ?
O6 C11 H11A 109.9 . . ?
C12 C11 H11A 109.9 . . ?
O6 C11 H11B 109.9 . . ?
C12 C11 H11B 109.9 . . ?
H11A C11 H11B 108.3 . . ?
O7 C12 C11 108.6(3) . . ?
O7 C12 H12A 110.0 . . ?
C11 C12 H12A 110.0 . . ?
O7 C12 H12B 110.0 . . ?
C11 C12 H12B 110.0 . . ?
H12A C12 H12B 108.4 . . ?
O7 C13 C14 108.4(3) . . ?
O7 C13 H13A 110.0 . . ?
C14 C13 H13A 110.0 . . ?
O7 C13 H13B 110.0 . . ?
C14 C13 H13B 110.0 . . ?
H13A C13 H13B 108.4 . . ?
O8 C14 C13 109.6(3) . . ?
O8 C14 H14A 109.8 . . ?
C13 C14 H14A 109.8 . . ?
O8 C14 H14B 109.8 . . ?
C13 C14 H14B 109.8 . . ?
H14A C14 H14B 108.2 . . ?
O8 C15 C16 109.3(3) . . ?
O8 C15 H15A 109.8 . . ?
C16 C15 H15A 109.8 . . ?
O8 C15 H15B 109.8 . . ?
C16 C15 H15B 109.8 . . ?
H15A C15 H15B 108.3 . . ?
O3 C16 C15 108.8(3) . . ?
O3 C16 H16A 109.9 . . ?
C15 C16 H16A 109.9 . . ?
O3 C16 H16B 109.9 . . ?
C15 C16 H16B 109.9 . . ?
H16A C16 H16B 108.3 . . ?
O1 N1 Fe1 163.2(3) . . ?
O2 N2 Fe1 171.2(2) . . ?
C2 N3 H3C 109.5 . . ?
C2 N3 H3D 109.5 . . ?
H3C N3 H3D 109.5 . . ?
C2 N3 H3E 109.5 . . ?
H3C N3 H3E 109.5 . . ?
H3D N3 H3E 109.5 . . ?
C5 O3 C16 113.4(2) . . ?
C6 O4 C7 112.2(2) . . ?
C9 O5 C8 112.3(2) . . ?
C10 O6 C11 112.3(2) . . ?
C12 O7 C13 112.0(2) . . ?
C15 O8 C14 111.7(2) . . ?
C1 S2 Fe1 101.28(11) . . ?
C3 S3 C3' 44.8(3) . . ?
C3 S3 Fe1 103.44(16) . . ?
C3' S3 Fe1 104.0(3) . . ?
N2 Fe1 N1 116.59(14) . . ?
N2 Fe1 S3 108.64(9) . . ?
N1 Fe1 S3 104.68(8) . . ?
N2 Fe1 S2 106.00(9) . . ?
N1 Fe1 S2 112.87(9) . . ?
S3 Fe1 S2 107.74(4) . . ?
 
_diffrn_measured_fraction_theta_max    0.994
_diffrn_reflns_theta_full              25.03
_diffrn_measured_fraction_theta_full   0.994
_refine_diff_density_max    0.489
_refine_diff_density_min   -0.348
_refine_diff_density_rms    0.062

****************************************************

data_complex_5
 
_audit_creation_method            SHELXL-97
_chemical_name_systematic
;
 ?
;
_chemical_name_common             ?
_chemical_melting_point           ?
_chemical_formula_moiety          'C52 H96 Fe2 N6 O22 S4'
_chemical_formula_sum             'C52 H96 Fe2 N6 O22 S4'
_chemical_formula_weight          1397.29
 
loop_
 _atom_type_symbol
 _atom_type_description
 _atom_type_scat_dispersion_real
 _atom_type_scat_dispersion_imag
 _atom_type_scat_source
 'C'  'C'   0.0033   0.0016
 'International Tables Vol C Tables 4.2.6.8 and 6.1.1.4'
 'H'  'H'   0.0000   0.0000
 'International Tables Vol C Tables 4.2.6.8 and 6.1.1.4'
 'N'  'N'   0.0061   0.0033
 'International Tables Vol C Tables 4.2.6.8 and 6.1.1.4'
 'O'  'O'   0.0106   0.0060
 'International Tables Vol C Tables 4.2.6.8 and 6.1.1.4'
 'S'  'S'   0.1246   0.1234
 'International Tables Vol C Tables 4.2.6.8 and 6.1.1.4'
 'Fe'  'Fe'   0.3463   0.8444
 'International Tables Vol C Tables 4.2.6.8 and 6.1.1.4'
 
_symmetry_cell_setting            triclinic
_symmetry_space_group_name_H-M    'P -1'
 
loop_
 _symmetry_equiv_pos_as_xyz
 'x, y, z'
 '-x, -y, -z'
 
_cell_length_a                    8.203(3)
_cell_length_b                    13.821(5)
_cell_length_c                    15.719(4)
_cell_angle_alpha                 107.632(7)
_cell_angle_beta                  95.624(9)
_cell_angle_gamma                 97.094(10)
_cell_volume                      1668.0(9)
_cell_formula_units_Z             1
_cell_measurement_temperature     200(2)
_cell_measurement_reflns_used     0
_cell_measurement_theta_min       0
_cell_measurement_theta_max       0
 
_exptl_crystal_description        prism
_exptl_crystal_colour             black
_exptl_crystal_size_max           0.28
_exptl_crystal_size_mid           0.25
_exptl_crystal_size_min           0.06
_exptl_crystal_density_meas       ?
_exptl_crystal_density_diffrn     1.391
_exptl_crystal_density_method     'not measured'
_exptl_crystal_F_000              742
_exptl_absorpt_coefficient_mu     0.635
_exptl_absorpt_correction_type    multi-scan
_exptl_absorpt_correction_T_min   0.8421
_exptl_absorpt_correction_T_max   0.9629
_exptl_absorpt_process_details    ?
 
_exptl_special_details
;
 ?
;
 
_diffrn_ambient_temperature       200(2)
_diffrn_radiation_wavelength      0.71073
_diffrn_radiation_type            MoK\a
_diffrn_radiation_source          'fine-focus sealed tube'
_diffrn_radiation_monochromator   graphite
_diffrn_measurement_device_type   ?
_diffrn_measurement_method        ?
_diffrn_detector_area_resol_mean  ?
_diffrn_standards_number          ?
_diffrn_standards_interval_count  ?
_diffrn_standards_interval_time   ?
_diffrn_standards_decay_%         ?
_diffrn_reflns_number             12922
_diffrn_reflns_av_R_equivalents   0.0880
_diffrn_reflns_av_sigmaI/netI     0.1699
_diffrn_reflns_limit_h_min        -9
_diffrn_reflns_limit_h_max        9
_diffrn_reflns_limit_k_min        -16
_diffrn_reflns_limit_k_max        16
_diffrn_reflns_limit_l_min        -18
_diffrn_reflns_limit_l_max        18
_diffrn_reflns_theta_min          1.57
_diffrn_reflns_theta_max          25.12
_reflns_number_total              5769
_reflns_number_gt                 2774
_reflns_threshold_expression      >2sigma(I)
 
_computing_data_collection        ?
_computing_cell_refinement        ?
_computing_data_reduction         ?
_computing_structure_solution     'SHELXS-86 (Sheldrick, 1986)'
_computing_structure_refinement   'SHELXL-97 (Sheldrick, 1997)'
_computing_molecular_graphics     'Ortep-3 for Windows (Farrugia, 1997)'
_computing_publication_material   'WinGX publication routines (Farrugia, 1999)'
 
_refine_special_details
;
 Refinement of F^2^ against ALL reflections.  The weighted R-factor wR and
 goodness of fit S are based on F^2^, conventional R-factors R are based
 on F, with F set to zero for negative F^2^. The threshold expression of
 F^2^ > 2sigma(F^2^) is used only for calculating R-factors(gt) etc. and is
 not relevant to the choice of reflections for refinement.  R-factors based
 on F^2^ are statistically about twice as large as those based on F, and R-
 factors based on ALL data will be even larger.
;
 
_refine_ls_structure_factor_coef  Fsqd
_refine_ls_matrix_type            full
_refine_ls_weighting_scheme       calc
_refine_ls_weighting_details
 'calc w=1/[\s^2^(Fo^2^)+(0.0803P)^2^+0.0000P] where P=(Fo^2^+2Fc^2^)/3'
_atom_sites_solution_primary      direct
_atom_sites_solution_secondary    difmap
_atom_sites_solution_hydrogens    geom
_refine_ls_hydrogen_treatment     constr
_refine_ls_extinction_method      none
_refine_ls_extinction_coef        ?
_refine_ls_number_reflns          5769
_refine_ls_number_parameters      388
_refine_ls_number_restraints      0
_refine_ls_R_factor_all           0.1751
_refine_ls_R_factor_gt            0.0759
_refine_ls_wR_factor_ref          0.2021
_refine_ls_wR_factor_gt           0.1621
_refine_ls_goodness_of_fit_ref    1.014
_refine_ls_restrained_S_all       1.014
_refine_ls_shift/su_max           0.001
_refine_ls_shift/su_mean          0.000
 
loop_
 _atom_site_label
 _atom_site_type_symbol
 _atom_site_fract_x
 _atom_site_fract_y
 _atom_site_fract_z
 _atom_site_U_iso_or_equiv
 _atom_site_adp_type
 _atom_site_occupancy
 _atom_site_symmetry_multiplicity
 _atom_site_calc_flag
 _atom_site_refinement_flags
 _atom_site_disorder_assembly
 _atom_site_disorder_group
C1 C 0.2829(8) 0.3701(5) 0.9899(4) 0.0375(18) Uani 1 1 d . . .
H1A H 0.1840 0.3449 1.0132 0.045 Uiso 1 1 calc R . .
H1B H 0.2582 0.4289 0.9700 0.045 Uiso 1 1 calc R . .
C2 C 0.3166(9) 0.2862(6) 0.9110(4) 0.0419(19) Uani 1 1 d . . .
H2A H 0.4093 0.3135 0.8845 0.050 Uiso 1 1 calc R . .
H2B H 0.3517 0.2304 0.9322 0.050 Uiso 1 1 calc R . .
C3 C 0.1984(8) 0.3688(5) 1.3055(4) 0.0310(17) Uani 1 1 d . . .
C4 C 0.3190(8) 0.4550(5) 1.3382(5) 0.0342(18) Uani 1 1 d . . .
H4 H 0.3888 0.4726 1.2985 0.041 Uiso 1 1 calc R . .
C5 C 0.3405(9) 0.5158(5) 1.4263(5) 0.0407(19) Uani 1 1 d . . .
H5 H 0.4257 0.5742 1.4470 0.049 Uiso 1 1 calc R . .
C6 C 0.2419(10) 0.4939(6) 1.4843(5) 0.045(2) Uani 1 1 d . . .
H6 H 0.2587 0.5356 1.5458 0.053 Uiso 1 1 calc R . .
C7 C 0.1175(10) 0.4108(6) 1.4532(5) 0.049(2) Uani 1 1 d . . .
H7 H 0.0458 0.3964 1.4933 0.059 Uiso 1 1 calc R . .
C8 C 0.0945(8) 0.3485(5) 1.3660(5) 0.0385(19) Uani 1 1 d . . .
H8 H 0.0077 0.2910 1.3459 0.046 Uiso 1 1 calc R . .
C9 C -0.2032(10) 0.2796(6) 0.9430(6) 0.061(3) Uani 1 1 d . . .
H9A H -0.1234 0.3185 0.9977 0.073 Uiso 1 1 calc R . .
H9B H -0.3105 0.2606 0.9623 0.073 Uiso 1 1 calc R . .
C10 C -0.2258(11) 0.3454(7) 0.8864(6) 0.066(3) Uani 1 1 d . . .
H10A H -0.3023 0.3058 0.8305 0.079 Uiso 1 1 calc R . .
H10B H -0.2767 0.4046 0.9191 0.079 Uiso 1 1 calc R . .
C11 C -0.0860(11) 0.4384(6) 0.8053(6) 0.058(2) Uani 1 1 d . . .
H11A H -0.1308 0.5016 0.8347 0.069 Uiso 1 1 calc R . .
H11B H -0.1647 0.3977 0.7507 0.069 Uiso 1 1 calc R . .
C12 C 0.0763(10) 0.4668(6) 0.7789(6) 0.057(2) Uani 1 1 d . . .
H12A H 0.0641 0.5106 0.7399 0.069 Uiso 1 1 calc R . .
H12B H 0.1558 0.5068 0.8334 0.069 Uiso 1 1 calc R . .
C13 C 0.2877(10) 0.3940(7) 0.7026(5) 0.059(3) Uani 1 1 d . . .
H13A H 0.3746 0.4271 0.7554 0.071 Uiso 1 1 calc R . .
H13B H 0.2815 0.4417 0.6669 0.071 Uiso 1 1 calc R . .
C14 C 0.3352(12) 0.2983(6) 0.6470(5) 0.057(2) Uani 1 1 d . . .
H14A H 0.2468 0.2639 0.5951 0.068 Uiso 1 1 calc R . .
H14B H 0.4385 0.3149 0.6230 0.068 Uiso 1 1 calc R . .
C15 C 0.3945(10) 0.1370(6) 0.6447(6) 0.058(2) Uani 1 1 d . . .
H15A H 0.4933 0.1476 0.6151 0.070 Uiso 1 1 calc R . .
H15B H 0.2993 0.1007 0.5972 0.070 Uiso 1 1 calc R . .
C16 C 0.4260(10) 0.0744(7) 0.7051(6) 0.060(2) Uani 1 1 d . . .
H16A H 0.4597 0.0094 0.6698 0.073 Uiso 1 1 calc R . .
H16B H 0.5192 0.1125 0.7532 0.073 Uiso 1 1 calc R . .
C17 C 0.3163(10) 0.0017(6) 0.8062(5) 0.048(2) Uani 1 1 d . . .
H17A H 0.3926 0.0484 0.8595 0.057 Uiso 1 1 calc R . .
H17B H 0.3695 -0.0589 0.7795 0.057 Uiso 1 1 calc R . .
C18 C 0.1550(10) -0.0328(6) 0.8353(5) 0.054(2) Uani 1 1 d . . .
H18A H 0.0772 -0.0780 0.7819 0.065 Uiso 1 1 calc R . .
H18B H 0.1758 -0.0725 0.8770 0.065 Uiso 1 1 calc R . .
C19 C -0.0790(10) 0.0260(7) 0.8896(6) 0.056(2) Uani 1 1 d . . .
H19A H -0.0866 -0.0268 0.9204 0.067 Uiso 1 1 calc R . .
H19B H -0.1498 -0.0028 0.8302 0.067 Uiso 1 1 calc R . .
C20 C -0.1388(12) 0.1206(6) 0.9453(5) 0.063(3) Uani 1 1 d . . .
H20A H -0.2505 0.1012 0.9598 0.075 Uiso 1 1 calc R . .
H20B H -0.0625 0.1525 1.0027 0.075 Uiso 1 1 calc R . .
C21 C 0.1050(9) -0.0070(6) 1.3781(5) 0.045(2) Uani 1 1 d . . .
H21A H 0.0243 -0.0055 1.3276 0.054 Uiso 1 1 calc R . .
H21B H 0.0674 0.0300 1.4353 0.054 Uiso 1 1 calc R . .
C22 C 0.2659(9) 0.1467(5) 1.3846(5) 0.0386(19) Uani 1 1 d . . .
H22A H 0.2278 0.1806 1.4426 0.046 Uiso 1 1 calc R . .
H22B H 0.1897 0.1550 1.3354 0.046 Uiso 1 1 calc R . .
C23 C 0.4391(8) 0.1966(5) 1.3841(4) 0.0326(18) Uani 1 1 d . . .
H23A H 0.4799 0.1609 1.3276 0.039 Uiso 1 1 calc R . .
H23B H 0.4399 0.2695 1.3878 0.039 Uiso 1 1 calc R . .
C24 C 0.7122(9) 0.2152(5) 1.4542(5) 0.0385(19) Uani 1 1 d . . .
H24A H 0.7343 0.2830 1.4449 0.046 Uiso 1 1 calc R . .
H24B H 0.7440 0.1630 1.4026 0.046 Uiso 1 1 calc R . .
C25 C 0.8104(9) 0.2179(5) 1.5394(5) 0.044(2) Uani 1 1 d . . .
H25A H 0.9273 0.2482 1.5418 0.053 Uiso 1 1 calc R . .
H25B H 0.7657 0.2615 1.5914 0.053 Uiso 1 1 calc R . .
C26 C 0.8890(10) 0.1148(6) 1.6263(5) 0.053(2) Uani 1 1 d . . .
H26A H 0.8317 0.1483 1.6772 0.063 Uiso 1 1 calc R . .
H26B H 1.0032 0.1531 1.6364 0.063 Uiso 1 1 calc R . .
N1 N 0.5809(8) 0.3171(4) 1.2279(4) 0.0421(16) Uani 1 1 d . . .
N2 N 0.4115(8) 0.1710(5) 1.0743(4) 0.0442(17) Uani 1 1 d . . .
N3 N 0.1698(6) 0.2431(4) 0.8403(3) 0.0288(14) Uani 1 1 d . . .
H3A H 0.1961 0.1924 0.7939 0.043 Uiso 1 1 calc R . .
H3B H 0.1384 0.2938 0.8197 0.043 Uiso 1 1 calc R . .
H3C H 0.0848 0.2167 0.8640 0.043 Uiso 1 1 calc R . .
O1 O 0.6988(7) 0.3209(5) 1.2778(4) 0.0668(18) Uani 1 1 d . . .
O2 O 0.4303(8) 0.0866(4) 1.0388(4) 0.0720(19) Uani 1 1 d . . .
O3 O -0.1457(7) 0.1919(4) 0.8979(3) 0.0573(15) Uani 1 1 d . . .
O4 O -0.0730(7) 0.3819(4) 0.8636(4) 0.0597(16) Uani 1 1 d . . .
O5 O 0.1380(7) 0.3777(4) 0.7321(3) 0.0551(15) Uani 1 1 d . . .
O6 O 0.3601(7) 0.2312(4) 0.6959(4) 0.0600(16) Uani 1 1 d . . .
O7 O 0.2886(7) 0.0515(4) 0.7442(4) 0.0547(15) Uani 1 1 d . . .
O8 O 0.0855(7) 0.0517(4) 0.8777(3) 0.0583(16) Uani 1 1 d . . .
O9 O 0.2628(6) 0.0421(4) 1.3731(3) 0.0399(13) Uani 1 1 d . . .
O10 O 0.5428(6) 0.1906(3) 1.4595(3) 0.0394(13) Uani 1 1 d . . .
O11 O 0.8028(6) 0.1167(4) 1.5443(3) 0.0436(13) Uani 1 1 d . . .
S1 S 0.4582(2) 0.41315(14) 1.07924(12) 0.0357(5) Uani 1 1 d . . .
S2 S 0.1719(2) 0.28237(15) 1.19513(13) 0.0432(5) Uani 1 1 d . . .
Fe1 Fe 0.42389(13) 0.28841(8) 1.14628(7) 0.0348(3) Uani 1 1 d . . .
 
loop_
 _atom_site_aniso_label
 _atom_site_aniso_U_11
 _atom_site_aniso_U_22
 _atom_site_aniso_U_33
 _atom_site_aniso_U_23
 _atom_site_aniso_U_13
 _atom_site_aniso_U_12
C1 0.035(5) 0.040(5) 0.036(5) 0.013(4) -0.007(3) 0.008(4)
C2 0.035(5) 0.056(5) 0.033(5) 0.011(4) 0.003(4) 0.010(4)
C3 0.025(4) 0.034(4) 0.040(5) 0.017(3) 0.002(3) 0.012(3)
C4 0.029(4) 0.035(5) 0.044(5) 0.022(4) 0.007(4) 0.002(4)
C5 0.040(5) 0.026(4) 0.051(5) 0.010(4) 0.005(4) -0.006(4)
C6 0.057(6) 0.033(5) 0.048(5) 0.015(4) 0.019(4) 0.012(4)
C7 0.062(6) 0.047(6) 0.058(6) 0.032(5) 0.036(5) 0.024(5)
C8 0.027(4) 0.028(4) 0.069(6) 0.024(4) 0.015(4) 0.010(4)
C9 0.035(5) 0.028(5) 0.099(7) -0.011(5) -0.002(5) 0.013(4)
C10 0.047(6) 0.089(8) 0.079(7) 0.045(6) 0.028(5) 0.013(5)
C11 0.080(7) 0.032(5) 0.061(6) 0.018(4) 0.001(5) 0.010(5)
C12 0.045(6) 0.034(5) 0.089(7) 0.008(5) 0.008(5) 0.023(4)
C13 0.047(6) 0.094(8) 0.044(5) 0.035(5) 0.007(4) 0.003(5)
C14 0.093(7) 0.032(5) 0.044(5) 0.015(4) 0.012(5) -0.004(5)
C15 0.043(5) 0.055(6) 0.071(7) 0.005(5) 0.030(5) 0.010(5)
C16 0.044(6) 0.086(7) 0.064(6) 0.036(5) 0.025(5) 0.014(5)
C17 0.065(6) 0.033(5) 0.046(5) 0.014(4) 0.003(4) 0.012(4)
C18 0.054(6) 0.032(5) 0.071(6) 0.007(4) 0.005(5) 0.015(4)
C19 0.048(6) 0.064(6) 0.067(6) 0.038(5) 0.011(5) 0.008(5)
C20 0.095(8) 0.047(6) 0.051(6) 0.030(5) 0.001(5) -0.001(5)
C21 0.033(5) 0.057(6) 0.052(5) 0.031(4) 0.002(4) 0.003(4)
C22 0.045(5) 0.032(5) 0.040(5) 0.014(4) 0.000(4) 0.012(4)
C23 0.040(5) 0.023(4) 0.040(5) 0.012(3) 0.011(4) 0.011(3)
C24 0.032(5) 0.035(5) 0.053(5) 0.020(4) 0.010(4) 0.004(4)
C25 0.042(5) 0.042(5) 0.050(5) 0.023(4) -0.002(4) -0.002(4)
C26 0.044(5) 0.059(6) 0.060(6) 0.037(5) -0.011(4) -0.003(4)
N1 0.036(4) 0.047(4) 0.046(4) 0.022(3) -0.003(3) 0.004(3)
N2 0.055(5) 0.034(4) 0.048(4) 0.014(3) 0.013(3) 0.015(3)
N3 0.025(3) 0.030(3) 0.028(3) 0.005(3) 0.001(3) 0.006(3)
O1 0.042(4) 0.093(5) 0.072(4) 0.048(4) -0.009(3) -0.007(3)
O2 0.104(5) 0.039(4) 0.072(4) 0.006(3) 0.021(4) 0.029(4)
O3 0.056(4) 0.058(4) 0.058(4) 0.017(3) 0.010(3) 0.011(3)
O4 0.062(4) 0.047(4) 0.066(4) 0.015(3) 0.000(3) 0.008(3)
O5 0.057(4) 0.058(4) 0.050(4) 0.022(3) 0.003(3) -0.002(3)
O6 0.055(4) 0.063(4) 0.058(4) 0.013(3) 0.016(3) 0.005(3)
O7 0.052(4) 0.050(4) 0.061(4) 0.018(3) 0.005(3) 0.007(3)
O8 0.058(4) 0.055(4) 0.061(4) 0.020(3) 0.008(3) 0.004(3)
O9 0.033(3) 0.036(3) 0.055(3) 0.021(2) 0.008(2) 0.006(2)
O10 0.037(3) 0.048(3) 0.041(3) 0.028(3) 0.004(2) 0.003(3)
O11 0.039(3) 0.037(3) 0.055(4) 0.022(3) -0.007(3) 0.000(2)
S1 0.0372(12) 0.0335(11) 0.0332(11) 0.0104(8) -0.0035(9) 0.0009(9)
S2 0.0380(12) 0.0402(13) 0.0455(13) 0.0102(9) 0.0003(9) -0.0027(10)
Fe1 0.0411(7) 0.0317(7) 0.0315(7) 0.0096(5) 0.0018(5) 0.0089(5)
 
_geom_special_details
;
 All esds (except the esd in the dihedral angle between two l.s. planes)
 are estimated using the full covariance matrix.  The cell esds are taken
 into account individually in the estimation of esds in distances, angles
 and torsion angles; correlations between esds in cell parameters are only
 used when they are defined by crystal symmetry.  An approximate (isotropic)
 treatment of cell esds is used for estimating esds involving l.s. planes.
;
 
loop_
 _geom_bond_atom_site_label_1
 _geom_bond_atom_site_label_2
 _geom_bond_distance
 _geom_bond_site_symmetry_2
 _geom_bond_publ_flag
C1 C2 1.495(9) . ?
C1 S1 1.812(6) . ?
C1 H1A 0.9900 . ?
C1 H1B 0.9900 . ?
C2 N3 1.483(8) . ?
C2 H2A 0.9900 . ?
C2 H2B 0.9900 . ?
C3 C4 1.379(9) . ?
C3 C8 1.404(9) . ?
C3 S2 1.758(7) . ?
C4 C5 1.366(9) . ?
C4 H4 0.9500 . ?
C5 C6 1.353(9) . ?
C5 H5 0.9500 . ?
C6 C7 1.368(10) . ?
C6 H6 0.9500 . ?
C7 C8 1.361(10) . ?
C7 H7 0.9500 . ?
C8 H8 0.9500 . ?
C9 O3 1.372(8) . ?
C9 C10 1.467(11) . ?
C9 H9A 0.9900 . ?
C9 H9B 0.9900 . ?
C10 O4 1.412(9) . ?
C10 H10A 0.9900 . ?
C10 H10B 0.9900 . ?
C11 O4 1.377(8) . ?
C11 C12 1.475(11) . ?
C11 H11A 0.9900 . ?
C11 H11B 0.9900 . ?
C12 O5 1.411(8) . ?
C12 H12A 0.9900 . ?
C12 H12B 0.9900 . ?
C13 O5 1.372(8) . ?
C13 C14 1.469(10) . ?
C13 H13A 0.9900 . ?
C13 H13B 0.9900 . ?
C14 O6 1.393(8) . ?
C14 H14A 0.9900 . ?
C14 H14B 0.9900 . ?
C15 O6 1.387(8) . ?
C15 C16 1.491(10) . ?
C15 H15A 0.9900 . ?
C15 H15B 0.9900 . ?
C16 O7 1.383(8) . ?
C16 H16A 0.9900 . ?
C16 H16B 0.9900 . ?
C17 O7 1.371(8) . ?
C17 C18 1.510(10) . ?
C17 H17A 0.9900 . ?
C17 H17B 0.9900 . ?
C18 O8 1.379(8) . ?
C18 H18A 0.9900 . ?
C18 H18B 0.9900 . ?
C19 O8 1.397(8) . ?
C19 C20 1.505(11) . ?
C19 H19A 0.9900 . ?
C19 H19B 0.9900 . ?
C20 O3 1.407(8) . ?
C20 H20A 0.9900 . ?
C20 H20B 0.9900 . ?
C21 O9 1.407(8) . ?
C21 C26 1.477(10) 2_658 ?
C21 H21A 0.9900 . ?
C21 H21B 0.9900 . ?
C22 O9 1.398(7) . ?
C22 C23 1.502(9) . ?
C22 H22A 0.9900 . ?
C22 H22B 0.9900 . ?
C23 O10 1.419(7) . ?
C23 H23A 0.9900 . ?
C23 H23B 0.9900 . ?
C24 O10 1.405(7) . ?
C24 C25 1.481(9) . ?
C24 H24A 0.9900 . ?
C24 H24B 0.9900 . ?
C25 O11 1.419(7) . ?
C25 H25A 0.9900 . ?
C25 H25B 0.9900 . ?
C26 O11 1.417(7) . ?
C26 C21 1.477(10) 2_658 ?
C26 H26A 0.9900 . ?
C26 H26B 0.9900 . ?
N1 O1 1.169(7) . ?
N1 Fe1 1.644(6) . ?
N2 O2 1.168(7) . ?
N2 Fe1 1.658(6) . ?
N3 H3A 0.9100 . ?
N3 H3B 0.9100 . ?
N3 H3C 0.9100 . ?
S1 Fe1 2.281(2) . ?
S2 Fe1 2.275(2) . ?
 
loop_
 _geom_angle_atom_site_label_1
 _geom_angle_atom_site_label_2
 _geom_angle_atom_site_label_3
 _geom_angle
 _geom_angle_site_symmetry_1
 _geom_angle_site_symmetry_3
 _geom_angle_publ_flag
C2 C1 S1 111.5(5) . . ?
C2 C1 H1A 109.3 . . ?
S1 C1 H1A 109.3 . . ?
C2 C1 H1B 109.3 . . ?
S1 C1 H1B 109.3 . . ?
H1A C1 H1B 108.0 . . ?
N3 C2 C1 112.6(6) . . ?
N3 C2 H2A 109.1 . . ?
C1 C2 H2A 109.1 . . ?
N3 C2 H2B 109.1 . . ?
C1 C2 H2B 109.1 . . ?
H2A C2 H2B 107.8 . . ?
C4 C3 C8 117.0(7) . . ?
C4 C3 S2 124.2(5) . . ?
C8 C3 S2 118.8(6) . . ?
C5 C4 C3 121.5(6) . . ?
C5 C4 H4 119.2 . . ?
C3 C4 H4 119.2 . . ?
C6 C5 C4 120.8(7) . . ?
C6 C5 H5 119.6 . . ?
C4 C5 H5 119.6 . . ?
C5 C6 C7 119.1(7) . . ?
C5 C6 H6 120.5 . . ?
C7 C6 H6 120.5 . . ?
C8 C7 C6 121.3(7) . . ?
C8 C7 H7 119.4 . . ?
C6 C7 H7 119.4 . . ?
C7 C8 C3 120.3(7) . . ?
C7 C8 H8 119.8 . . ?
C3 C8 H8 119.8 . . ?
O3 C9 C10 111.6(8) . . ?
O3 C9 H9A 109.3 . . ?
C10 C9 H9A 109.3 . . ?
O3 C9 H9B 109.3 . . ?
C10 C9 H9B 109.3 . . ?
H9A C9 H9B 108.0 . . ?
O4 C10 C9 111.3(7) . . ?
O4 C10 H10A 109.4 . . ?
C9 C10 H10A 109.4 . . ?
O4 C10 H10B 109.4 . . ?
C9 C10 H10B 109.4 . . ?
H10A C10 H10B 108.0 . . ?
O4 C11 C12 111.5(7) . . ?
O4 C11 H11A 109.3 . . ?
C12 C11 H11A 109.3 . . ?
O4 C11 H11B 109.3 . . ?
C12 C11 H11B 109.3 . . ?
H11A C11 H11B 108.0 . . ?
O5 C12 C11 110.3(7) . . ?
O5 C12 H12A 109.6 . . ?
C11 C12 H12A 109.6 . . ?
O5 C12 H12B 109.6 . . ?
C11 C12 H12B 109.6 . . ?
H12A C12 H12B 108.1 . . ?
O5 C13 C14 112.5(7) . . ?
O5 C13 H13A 109.1 . . ?
C14 C13 H13A 109.1 . . ?
O5 C13 H13B 109.1 . . ?
C14 C13 H13B 109.1 . . ?
H13A C13 H13B 107.8 . . ?
O6 C14 C13 111.9(7) . . ?
O6 C14 H14A 109.2 . . ?
C13 C14 H14A 109.2 . . ?
O6 C14 H14B 109.2 . . ?
C13 C14 H14B 109.2 . . ?
H14A C14 H14B 107.9 . . ?
O6 C15 C16 108.8(7) . . ?
O6 C15 H15A 109.9 . . ?
C16 C15 H15A 109.9 . . ?
O6 C15 H15B 109.9 . . ?
C16 C15 H15B 109.9 . . ?
H15A C15 H15B 108.3 . . ?
O7 C16 C15 112.7(7) . . ?
O7 C16 H16A 109.1 . . ?
C15 C16 H16A 109.1 . . ?
O7 C16 H16B 109.1 . . ?
C15 C16 H16B 109.1 . . ?
H16A C16 H16B 107.8 . . ?
O7 C17 C18 110.6(7) . . ?
O7 C17 H17A 109.5 . . ?
C18 C17 H17A 109.5 . . ?
O7 C17 H17B 109.5 . . ?
C18 C17 H17B 109.5 . . ?
H17A C17 H17B 108.1 . . ?
O8 C18 C17 109.8(6) . . ?
O8 C18 H18A 109.7 . . ?
C17 C18 H18A 109.7 . . ?
O8 C18 H18B 109.7 . . ?
C17 C18 H18B 109.7 . . ?
H18A C18 H18B 108.2 . . ?
O8 C19 C20 109.5(7) . . ?
O8 C19 H19A 109.8 . . ?
C20 C19 H19A 109.8 . . ?
O8 C19 H19B 109.8 . . ?
C20 C19 H19B 109.8 . . ?
H19A C19 H19B 108.2 . . ?
O3 C20 C19 110.3(7) . . ?
O3 C20 H20A 109.6 . . ?
C19 C20 H20A 109.6 . . ?
O3 C20 H20B 109.6 . . ?
C19 C20 H20B 109.6 . . ?
H20A C20 H20B 108.1 . . ?
O9 C21 C26 110.3(6) . 2_658 ?
O9 C21 H21A 109.6 . . ?
C26 C21 H21A 109.6 2_658 . ?
O9 C21 H21B 109.6 . . ?
C26 C21 H21B 109.6 2_658 . ?
H21A C21 H21B 108.1 . . ?
O9 C22 C23 109.9(6) . . ?
O9 C22 H22A 109.7 . . ?
C23 C22 H22A 109.7 . . ?
O9 C22 H22B 109.7 . . ?
C23 C22 H22B 109.7 . . ?
H22A C22 H22B 108.2 . . ?
O10 C23 C22 108.4(5) . . ?
O10 C23 H23A 110.0 . . ?
C22 C23 H23A 110.0 . . ?
O10 C23 H23B 110.0 . . ?
C22 C23 H23B 110.0 . . ?
H23A C23 H23B 108.4 . . ?
O10 C24 C25 108.7(5) . . ?
O10 C24 H24A 109.9 . . ?
C25 C24 H24A 109.9 . . ?
O10 C24 H24B 109.9 . . ?
C25 C24 H24B 109.9 . . ?
H24A C24 H24B 108.3 . . ?
O11 C25 C24 109.7(6) . . ?
O11 C25 H25A 109.7 . . ?
C24 C25 H25A 109.7 . . ?
O11 C25 H25B 109.7 . . ?
C24 C25 H25B 109.7 . . ?
H25A C25 H25B 108.2 . . ?
O11 C26 C21 109.4(6) . 2_658 ?
O11 C26 H26A 109.8 . . ?
C21 C26 H26A 109.8 2_658 . ?
O11 C26 H26B 109.8 . . ?
C21 C26 H26B 109.8 2_658 . ?
H26A C26 H26B 108.2 . . ?
O1 N1 Fe1 168.2(6) . . ?
O2 N2 Fe1 164.3(6) . . ?
C2 N3 H3A 109.5 . . ?
C2 N3 H3B 109.5 . . ?
H3A N3 H3B 109.5 . . ?
C2 N3 H3C 109.5 . . ?
H3A N3 H3C 109.5 . . ?
H3B N3 H3C 109.5 . . ?
C9 O3 C20 114.2(7) . . ?
C11 O4 C10 114.6(7) . . ?
C13 O5 C12 115.9(7) . . ?
C15 O6 C14 113.9(6) . . ?
C17 O7 C16 114.6(6) . . ?
C18 O8 C19 113.0(6) . . ?
C22 O9 C21 112.2(5) . . ?
C24 O10 C23 112.3(5) . . ?
C26 O11 C25 112.3(5) . . ?
C1 S1 Fe1 101.3(2) . . ?
C3 S2 Fe1 107.3(2) . . ?
N1 Fe1 N2 112.4(3) . . ?
N1 Fe1 S2 113.5(2) . . ?
N2 Fe1 S2 102.4(2) . . ?
N1 Fe1 S1 106.1(2) . . ?
N2 Fe1 S1 112.8(2) . . ?
S2 Fe1 S1 109.75(8) . . ?
 
_diffrn_measured_fraction_theta_max    0.969
_diffrn_reflns_theta_full              25.12
_diffrn_measured_fraction_theta_full   0.969
_refine_diff_density_max    0.968
_refine_diff_density_min   -0.383
_refine_diff_density_rms    0.089
